# Supplementary material for: Positional screening and NMR structure determination of side-chain-to-side-chain cyclized β3-peptides
Source: Royal Society of Chemistry journal article supplement (doi:10.1039/c1ob06422c), 2011-11-17
Supplement: c1ob06422c.pdf [file c1ob06422c.pdf]

## Positional screening and NMR structure determination of side-chain-to-side-chain cyclized $\beta^3$ -peptides<sup>†,‡</sup>

Esther Vaz,<sup>a</sup> Sonja A. Dames,<sup>b</sup> Matthias Geyer<sup>\*a</sup> and Luc Brunsveld<sup>\*ac</sup>

### Contents

|                                                              |     |
|--------------------------------------------------------------|-----|
| 1. General information.                                      | S2  |
| 2. $\beta$ -Peptide synthesis.                               | S4  |
| 3. Circular Dichroism Spectroscopy.                          | S15 |
| 4. NMR characterization                                      | S17 |
| 5. Structure calculations without H-bond restraints in vacuo | S36 |
| 6. References                                                | S37 |

Additional data as separate files from the author:

-Parameter files: parallhdg\_beta.pro, topallhdg\_beta.pro, toph19\_beta.pep

-Restraint files: C18-noe2calc\_2.tbl (distance calibration), C18-noe2\_2.tbl (bin calibration), C18-hbo.tbl (hydrogen bond restraints)

-Pdb files with the final ensemble of 20 structures: 8b\_bin-vacuo.pdb, 8b\_bin\_water.pdb, 8b\_calib\_water.pdb

## 1. General information.

1-D NMR experiments were acquired on a Varian Mercury 400 or a Varian Inova 600 spectrometer and processed with XWINNMR. LC-ESI-MS was carried out by using an Agilent 1100 series binary pump together with a reversed-phase HPLC C18 column (Macherey-Nagel) and a Finnigan Thermoquest LCQ. Purification of  $\beta$ -peptides was performed with an Agilent 1100 Series with a Nucleodur C18 gravity column (Macherey-Nagel) and flow rate of 25 mL/min. UV spectra were obtained in a Varian Cary 100 Bio spectrophotometer. CD spectra were recorded on a JASCO J-815 spectropolarimeter. Reactions under microwave irradiation were carried out in a CEM Explorer microwave, a monomodal synthesis reactor equipped with a 300 W (max) power source, an infrared sensor for temperature control and an automated synthesis workstation module.

Tenta Gel R PHB resin with a loading of 0.22 mmol/g was purchased from Rapp Polymere GmbH. D<sub>2</sub>O was purchased from Deutero GmbH and CD<sub>3</sub>OH from Aldrich. PyBOP<sup>®</sup> was obtained from Novabiochem. Commercial Fmoc protected  $\beta^3$ -L-amino acids were obtained from Aldrich-Sigma and Novabiochem. All other reagents were purchased from Aldrich-Sigma, Fluka and Acros.

2-D NMR experiments with  $\beta^3$ -peptide samples were performed on a Varian Inova 600 spectrometer, equipped with a triple resonance probe with shielded Z gradients. Peptides were dissolved either in CD<sub>3</sub>OH or in aqueous buffer (10 mM NaPi [pH 7.4]) with 90:10 H<sub>2</sub>O/D<sub>2</sub>O at a concentration of 1-2 mM and measured in a temperature range from 25°C to -6°C. Homonuclear two-dimensional experiments were recorded following the Varian NMR suite with typically 2048 x 512 data points. NMR spectra were converted to Bruker format and processed with XWINNMR and evaluated and plotted with Aurelia.<sup>1</sup> The assignment strategy was based on the identification of individual resonance spin systems from homonuclear TOCSY experiments following the sequential

path with 2D ROESY spectra similarly as described.<sup>2</sup> Mixing times in TOCSY experiments were around 70 ms. Mixing times in ROESY experiments were 150 and/or 300 ms. Typically, 2D measurements were recorded with  $F1 \times F2 = 64 \times 2048$  data points with 8 scans each.

## 2. $\beta$ -Peptide synthesis.

### A. $\beta$ -Amino acid building blocks

Not commercial Fmoc-protected and Boc-protected  $\beta^3$ -L-amino acid derivatives were prepared by homologation from the corresponding available  $\alpha$ -L-amino acids as described previously.<sup>3</sup> Analytical data of  $\beta^3$ -L-amino acid derivatives newly used for this study are reported below.

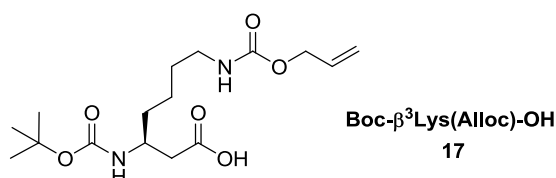

Boc- $\beta^3$ Lys(Alloc)-OH (**17**): Yield: 85%.  $^1\text{H}$  NMR (400 MHz,  $\text{CD}_3\text{CN}$ )  $\delta$  ppm 5.92 (m, 1H, CH), 5.69 (bs, 1H, NH), 5.42 (d,  $J = 8.5$  Hz, 1H, NH), 5.27 (d,  $J = 17.3$  Hz, 1H, CH), 5.17 (dd,  $J = 10.5$  Hz, 1H, CH), 4.49 (d,  $J = 5.0$  Hz, 2H,  $\text{CH}_2$ ), 3.81 (m, 1H, CH), 3.07 (q,  $J = 6.6$  Hz, 2H,  $\text{CH}_2$ ), 2.42 (d,  $J = 6.4$  Hz, 2H,  $\text{CH}_2$ ), 1.6-1.2 (m, 6H,  $\text{CH}_2$ ), 1.39 (s, 9H,  $\text{CH}_3$ ).  $^{13}\text{C}$  NMR (100 MHz,  $\text{CD}_3\text{CN}$ )  $\delta$  ppm 172.6 (s), 156.6 (s), 155.8 (s), 134.0 (d), 117.6 (t), 78.6 (s), 64.9 (t), 47.9 (d), 40.6 (t), 39.5 (t), 34.3 (t), 29.6 (t), 27.9 (q) 23.1 (t). ESI-MS: 344.92 ( $\text{M} + \text{H}$ )<sup>+</sup> (calc. mass 345.20). HRMS (ESI): calc for ( $\text{M} + \text{H}$ )<sup>+</sup> 345.2020; found 345.2021.

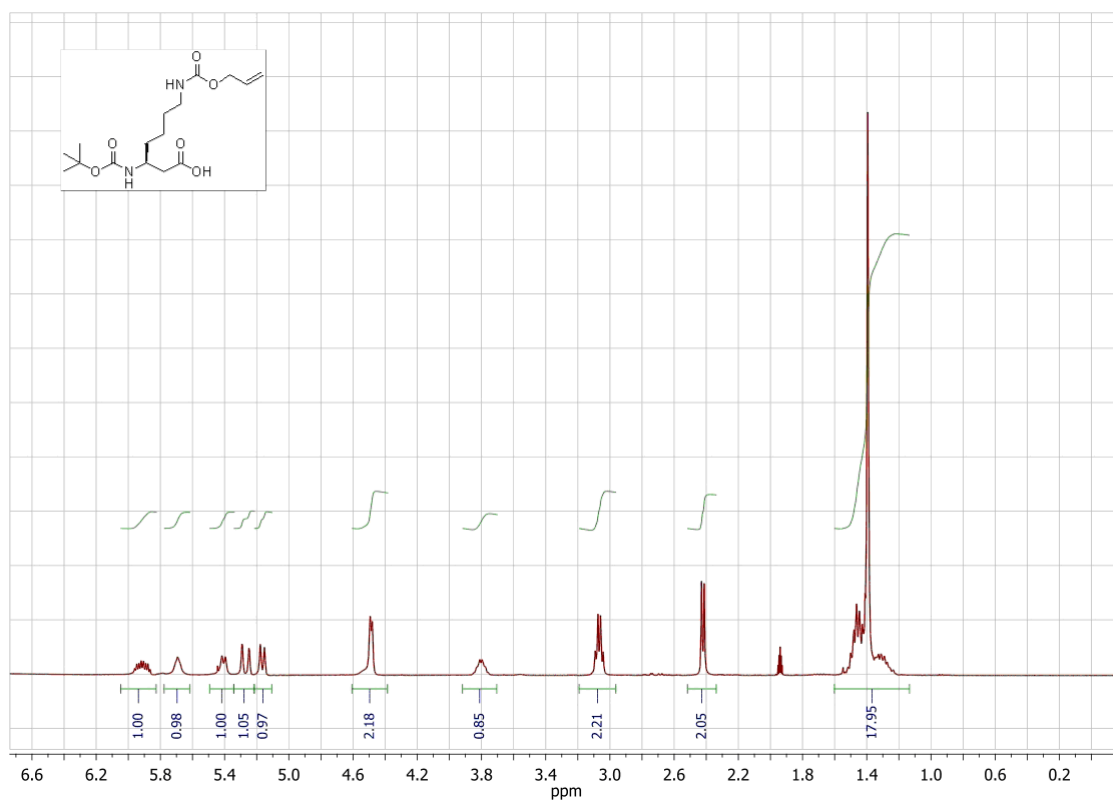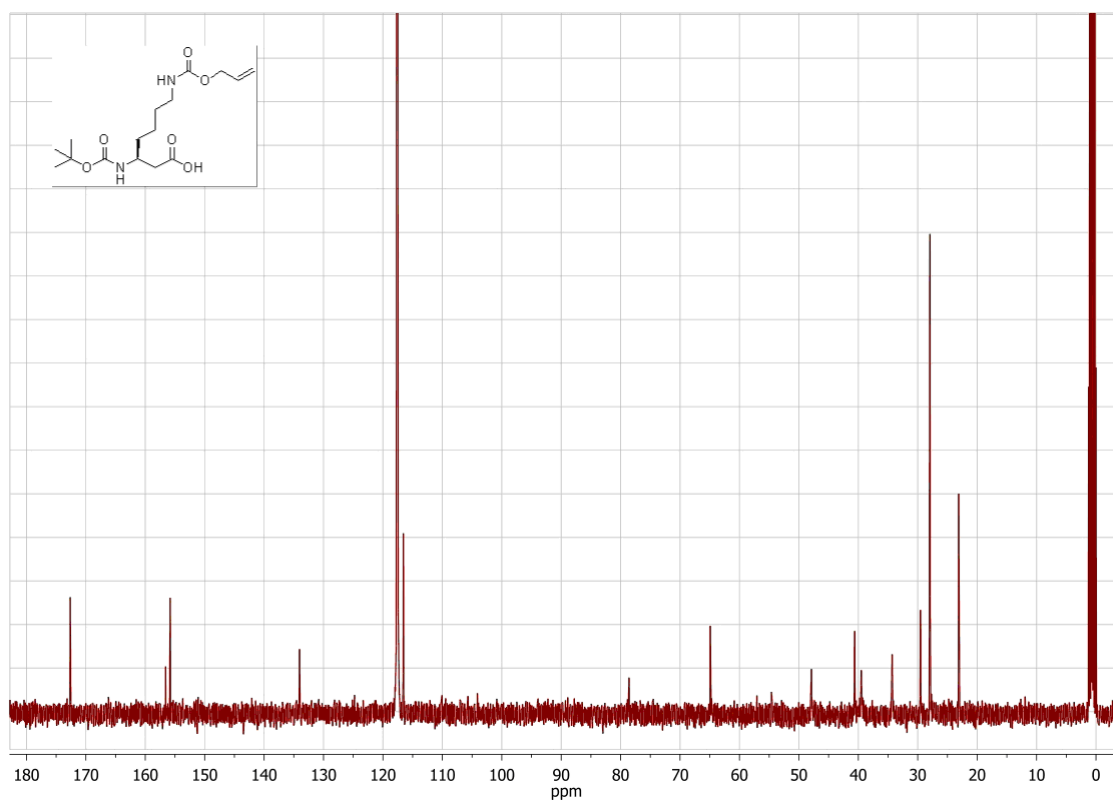

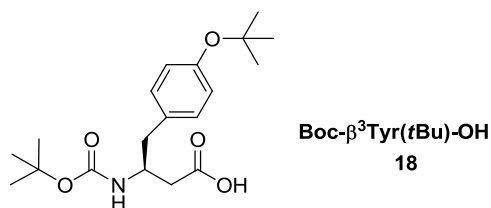

**Boc-β<sup>3</sup>Tyr(tBu)-OH (18)**: Yield: 67%. <sup>1</sup>H NMR (400 MHz, CD<sub>3</sub>CN) δ ppm 7.10 (d, *J* = 8.4 Hz, 2H, CH), 6.90 (d, *J* = 8.4 Hz, 2H, CH), 5.33 (bs, 1H, NH), 4.03 (m, 1H, CH), 2.8-2.6 (m, 2H, CH<sub>2</sub>), 2.6-2.3 (m, 2H, CH<sub>2</sub>), 1.33 (s, 9H, CH<sub>3</sub>), 1.33 (s, 9H, CH<sub>3</sub>), 1.29 (s, 9H, CH<sub>3</sub>). <sup>13</sup>C NMR (100 MHz, CD<sub>3</sub>CN) δ ppm 173.2 (s), 156.1 (s), 154.9 (s), 134.2 (s), 130.7 (d), 124.7 (d), 79.3 (s), 78.8 (s), 50.2 (d), 40.5 (t), 39.3 (t), 29.0 (q), 28.5 (q). ESI-MS: 351.80 (M + H)<sup>+</sup> (calc. mass 352.21).

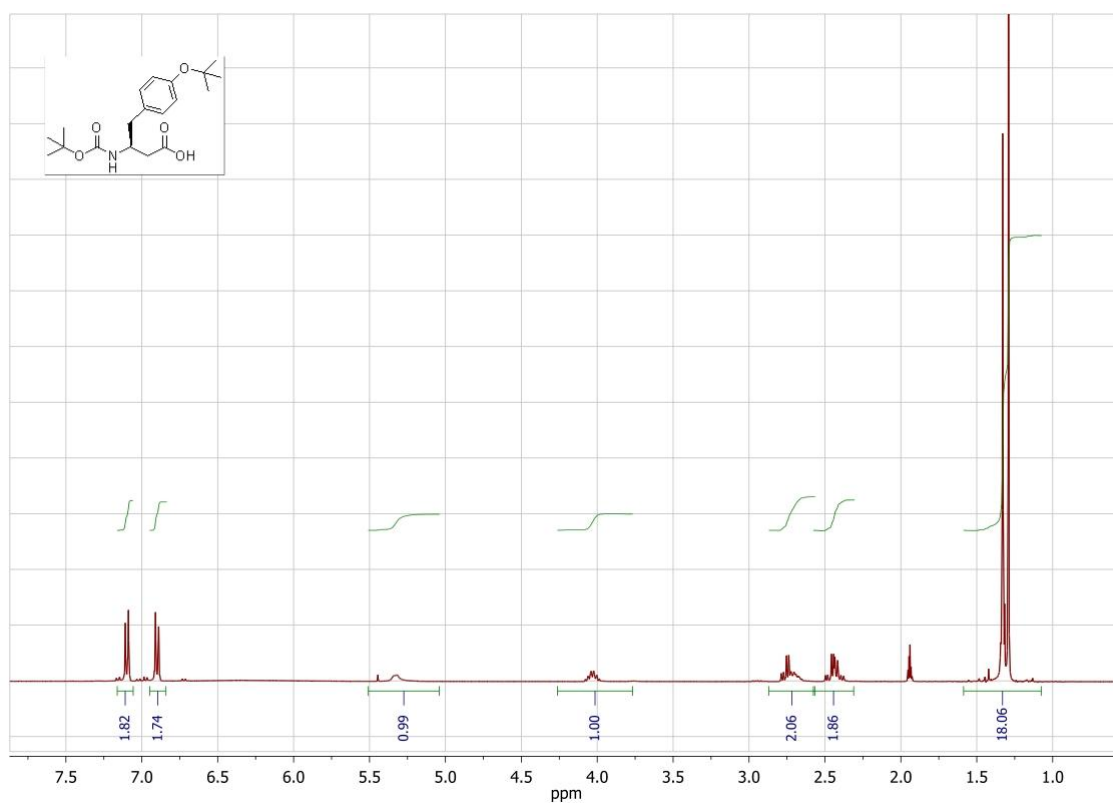

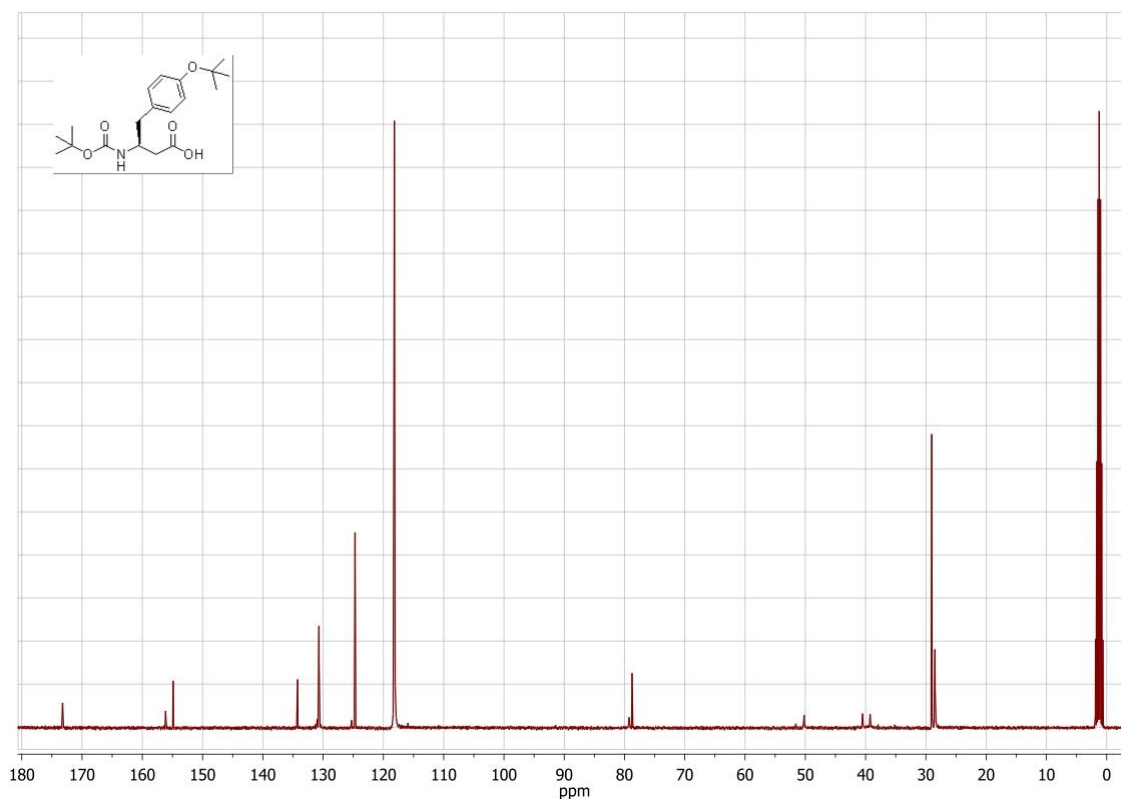

### B. $\beta^3$ -Peptide synthesis.

**Loading of the resin.** Tenta Gel R PHB resin (1.0 g, 0.22 mmol/g resin initial loading) was swollen in dry CH<sub>2</sub>Cl<sub>2</sub> (10.0 mL) for 30 min. A solution of Fmoc protected  $\beta^3$ -amino acid (3 equiv) and *N,N'*-diisopropylcarbodiimide (DIC) (46.7  $\mu$ L, 1.5 equiv) in dry CH<sub>2</sub>Cl<sub>2</sub> (1.5 mL) was stirred for 20 min at room temperature and then added to the resin, followed by 4-dimethylaminopyridine (DMAP) (36.7 mg, 1.5 equiv), and the suspension was stirred at room temperature for 21 h. The resin was washed with CH<sub>2</sub>Cl<sub>2</sub> (5 x 30 s), *N*-methyl-2-pyrrolidone (NMP) (5 x 30 s), 90:10 NMP/MeOH (10 min), NMP (5 x 30 s), CH<sub>2</sub>Cl<sub>2</sub> (5 x 30 s), shrunk down with diethyl ether (5 x 30 s) and dried under vacuum. Fmoc-determination by UV-spectrophotometry at 301 nm with a small sample of the resin (c.a. 2 mg) resulted in calculated loadings given in the Table S1. Unreacted sites of the resin were capped with a mixture of acetic anhydride (2.1 mL, 100 equiv), DMAP (29.6 mg, 1.1 equiv) and NMP (12 mL) by stirring

for 70 min at room temperature. The resin was subsequently washed with NMP (5 x 30 s), CH<sub>2</sub>Cl<sub>2</sub> (5 x 30 s) and Et<sub>2</sub>O (5 x 30 s). Synthesis of  $\beta$ -peptides **1-10** has been reported previously.<sup>5</sup>

**Table S1.** Calculated resin loadings (mmol/g resin).

| $\beta^3$ -peptide resin                | Loading (mmol/g resin) |
|-----------------------------------------|------------------------|
| Fmoc- $\beta^3$ Tyr( <i>t</i> Bu) resin | 0.19                   |
| Fmoc- $\beta^3$ Glu(Allyl) resin        | 0.20                   |
| Fmoc- $\beta^3$ Asp(Allyl) resin        | 0.18                   |

**Microwave synthesis of  $\beta$ -peptides 11-16.**  $\beta$ -Peptides were synthesized on a 38  $\mu$ mol scale (200 mg of resin) using microwave irradiation. The Fmoc deprotection was carried out with 20% v/v piperidine/NMP (3 mL, 50 W maximum power, 60 °C, ramp 2 min, hold 2 min), the mixture was filtered and the deprotection protocol was repeated once, then the resin was washed with NMP (5 x 30 s). Coupling of each unit was achieved *via* treatment of the deprotected resin with a cocktail containing Fmoc- $\beta^3$ -amino acid (3 equiv), HBTU (43.2 mg, 0.114 mmol, 3 equiv), HOBt (17.5 mg, 0.114 mmol, 3 equiv) and DIEA (39.7  $\mu$ L, 0.228 mmol, 6 equiv) in 3 mL of 0.8 M LiCl in NMP under microwave irradiation (50 W maximum power, 45 °C, ramp 2 min, hold 4 min). After filtration the process was repeated.

These steps were repeated until the  $\beta^3$ -peptide sequence was complete. The Allyl and Alloc protecting groups were removed as described for  $\alpha$ -peptides.<sup>4</sup> The resin was washed with NMP (5 x 30 s), CH<sub>2</sub>Cl<sub>2</sub> (5 x 30 s), Et<sub>2</sub>O (5 x 30 s) and dried under vacuum overnight. Then the resin was swollen with degassed CH<sub>2</sub>Cl<sub>2</sub> (3 x 2 min) while Argon was bubbled through the mixture. A solution of PhSiH<sub>3</sub> (85.9  $\mu$ L, 24 equiv) in 0.5 mL of CH<sub>2</sub>Cl<sub>2</sub> was added, and stirred again with a flow of Argon for 2 min. Subsequently, a solution of Pd(PPh<sub>3</sub>)<sub>4</sub> (8.4 mg, 0.25 equiv) in 1.5 mL of CH<sub>2</sub>Cl<sub>2</sub> was added and after Argon was bubbled through the resin for 2 min, the reaction was shaken for 30 min under Argon. The peptide resin was washed with CH<sub>2</sub>Cl<sub>2</sub> (3 x 2 min), NMP (3 x 2 min) and again with CH<sub>2</sub>Cl<sub>2</sub> (4 x 2 min) and the process was repeated. Finally, the resin was washed with CH<sub>2</sub>Cl<sub>2</sub> (3 x 2 min), NMP (3 x 2 min), a 0.02 M solution of Et<sub>2</sub>NCS<sub>2</sub>Na in NMP (3 x 2 min) and again with NMP (5 x 30 s).



**Linear  $\beta^3$ -peptides (11-16a).** The final Fmoc protecting group was removed as described above, the resin was washed with NMP (5 x 30 s),  $\text{CH}_2\text{Cl}_2$  (5 x 30 s) and  $\text{Et}_2\text{O}$  (5 x 30 s) and dried under vacuum for 3 h. The resin was treated with a cleavage cocktail composed of 2% v/v water and 2% v/v triisopropylsilane (TIPS) in trifluoroacetic acid (TFA), and after 3 h, the resin was washed with TFA (3 x 15 s). The cleaved  $\beta^3$ -peptide was collected, concentrated by rotary evaporation into less than 1 mL solution and precipitated by addition of cold  $\text{Et}_2\text{O}$  (10 mL). The mixture was cooled in a liquid  $\text{N}_2$  bath for 1 min, centrifuged (10000 rpm, 5 min, 4 °C) and the  $\text{Et}_2\text{O}$  was decanted from the pellet. Cold  $\text{Et}_2\text{O}$  was added again and the procedure was repeated twice. The crude peptide obtained was dissolved in  $\text{H}_2\text{O}/\text{CH}_3\text{CN}$  and lyophilized to dryness.

**Cyclic  $\beta^3$ -peptides (11-16b).** To the Alloc/Allyl deprotected  $\beta^3$ -peptide resin HATU (14.5 mg, 1 equiv) and DIEA (19.5  $\mu\text{L}$ , 3 equiv) in 3 mL of NMP (or 1:1 NMP/THF for (11-16b) was added and shaken for 12 h to undergo cyclization *via* the free carboxylic acid side-chain of  $\beta^3$ -Glu/ $\beta^3$ -Asp and the free amino group side-chain of  $\beta^3$ -Lys/ $\beta^3$ -Orn. This process was repeated until a negative TNBS test resulted. After washing the resin with NMP (5 x 30 s), the final Fmoc protecting group was removed and the peptide was cleaved from the resin as described for the linear  $\beta^3$ -peptides. The precipitate obtained was dissolved in  $\text{H}_2\text{O}/\text{CH}_3\text{CN}$  and lyophilized to dryness.

**$\beta^3$ -Peptide purification and analysis.** The crude reaction mixture of each  $\beta$ -peptide synthesized was analyzed by LC-MS.  $\beta$ -Peptides were then purified by reverse-phase HPLC on a Nucleodur C18 Gravity column (125 x 21 mm, Macherey-Nagel) with a linear gradient of A (0.1%  $\text{HCOOH}$  in  $\text{H}_2\text{O}$ ) and B (0.1%  $\text{HCOOH}$  in  $\text{CH}_3\text{CN}$ ) from 10% to 50% of B and flow rate of 25  $\text{mL min}^{-1}$  and were detected at 214 nm using a diode array UV/VIS detector. The identities and purities of the purified  $\beta$ -peptides were assessed by LC-MS (ESI mass spectrometry) (Table S2). Following purification, all  $\beta$ -peptides were lyophilized and kept at  $-20$  °C.

**Table S2.** Analytical data of synthesized  $\beta$ -peptides. Analytical data for  $\beta$ -peptides **1-10** have been previously reported.<sup>3</sup>

| $\beta^3$ -peptide         | Calcd Mass<br>(M+H) <sup>+</sup> | Found Mass<br>(M+H) <sup>+</sup> | Purity | Yield |
|----------------------------|----------------------------------|----------------------------------|--------|-------|
| Lin(1,4)-LysGlu <b>11a</b> | 936.58                           | 936.53                           | > 99%  | 27%   |
| Cy(1,4)-LysGlu <b>11b</b>  | 918.57                           | 918.57                           | 90%    | 5%    |
| Lin(1,4)-LysAsp <b>12a</b> | 922.56                           | 922.51                           | > 99%  | 39%   |
| Cy(1,4)-LysAsp <b>12b</b>  | 904.55                           | 904.56                           | 98%    | 11%   |
| Lin(1,4)-OrnGlu <b>13a</b> | 922.56                           | 922.52                           | > 99%  | 26%   |
| Cy(1,4)-OrnGlu <b>13b</b>  | 904.55                           | 904.53                           | > 99%  | 6%    |
| Lin(1,4)-OrnAsp <b>14a</b> | 908.55                           | 908.48                           | > 99%  | 40%   |
| Cy(1,4)-OrnAsp <b>14b</b>  | 890.54                           | 890.59                           | > 99%  | 7%    |
| Lin(4,7)-LysGlu <b>15a</b> | 936.58                           | 936.53                           | > 99%  | 15%   |
| Cy(4,7)-LysGlu <b>15b</b>  | 918.57                           | 918.53                           | 91%    | 1%    |
| Lin(4,7)-LysAsp <b>16a</b> | 922.56                           | 922.52                           | > 99%  | 17%   |
| Cy(4,7)-LysAsp <b>16b</b>  | 904.55                           | 904.49                           | > 99%  | 5%    |

Representative LC-MS spectra of the linear  $\beta^3$ -peptides **12a**, **13a** and **16a** and cyclic  $\beta^3$ -peptides **12b**, **13b** and **16b** are shown.

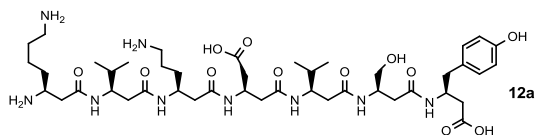

Lin(1,4)-LysAsp **12a**: calc. mass (M+H)<sup>+</sup> 922.56

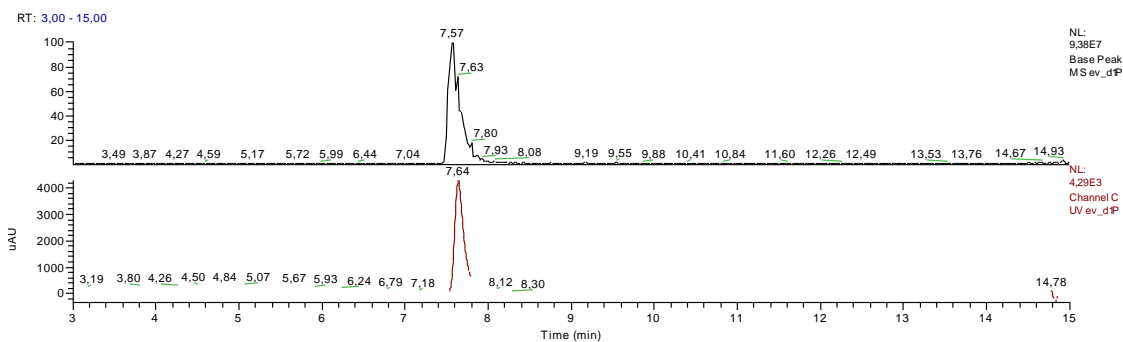

ev\_d1P #299-322 RT: 7.47-8.03 AV: 24 NL: 2.86E7  
T: + c ESI Full ms[150,00-2000,00]

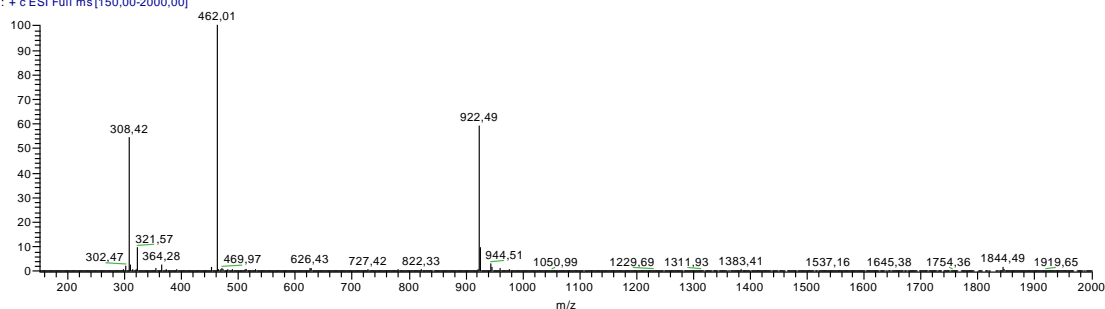

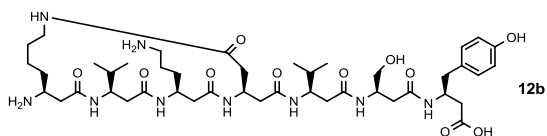

**Cy(1,4)-LysAsp 12b: calc. mass (M+H)<sup>+</sup> 904.55**

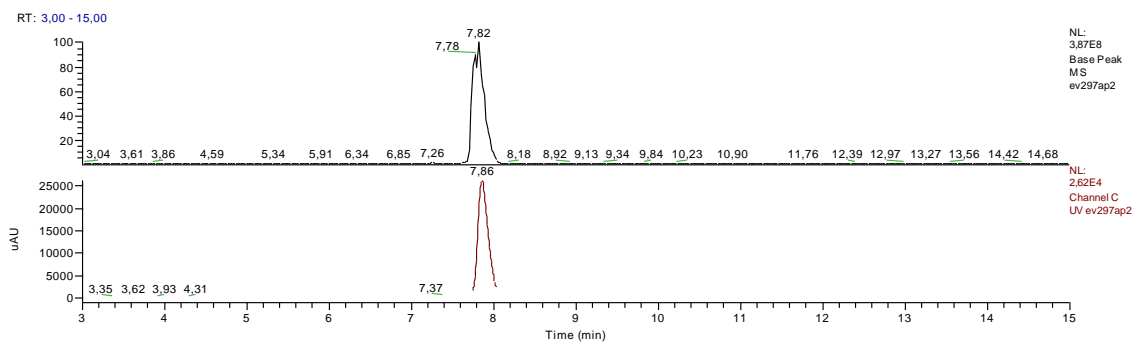

ev297ap2 #305-322 RT: 7.63-8.03 AV: 18 NL: 1.55E8  
 T: + c ESI Full ms[150,00-2000,00]

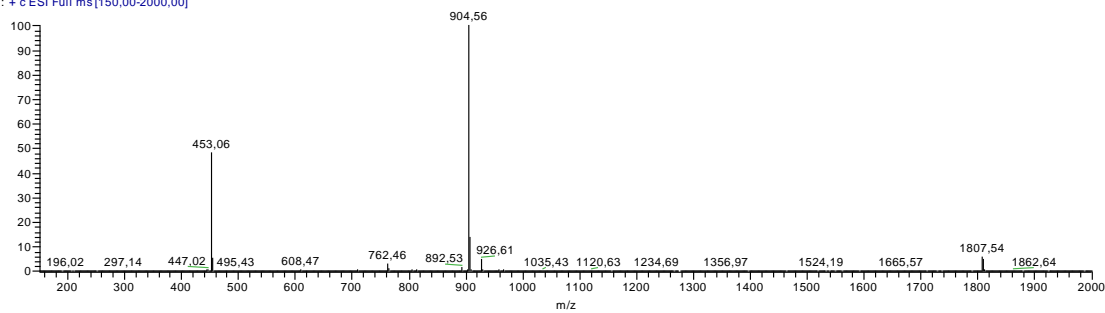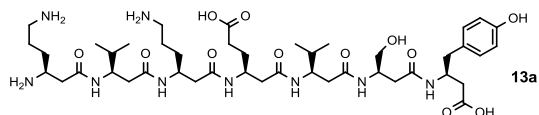

**Lin(1,4)-OrnGlu 13a: calc. mass (M+H)<sup>+</sup> 922.56**

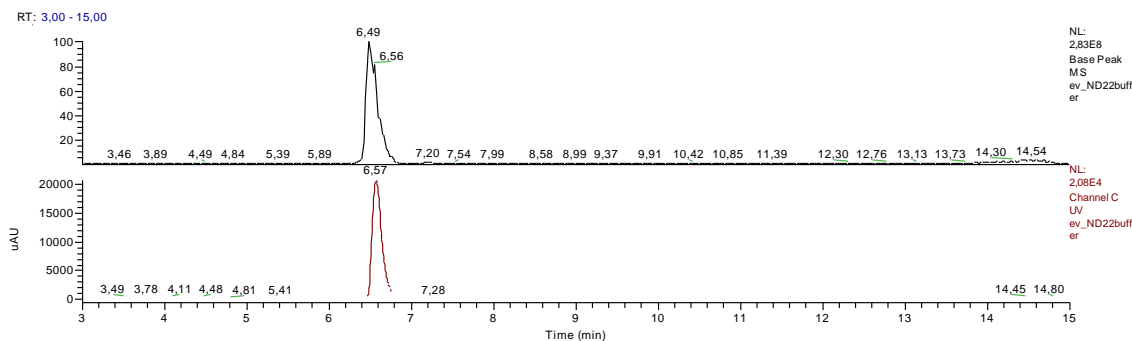

ev\_ND22buffer #255-275 RT: 6.40-6.87 AV: 21 NL: 9.67E7  
 T: + c ESI Full ms[150,00-2000,00]

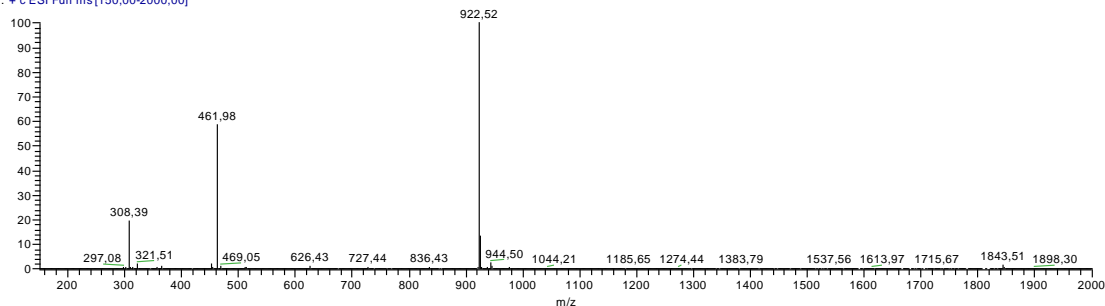

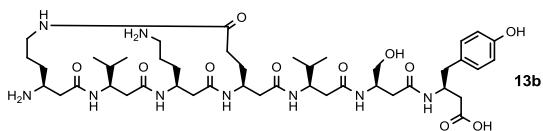

**Cy(1,4)-OrnGlu 13b: calc. mass (M+H)<sup>+</sup> 904.55**

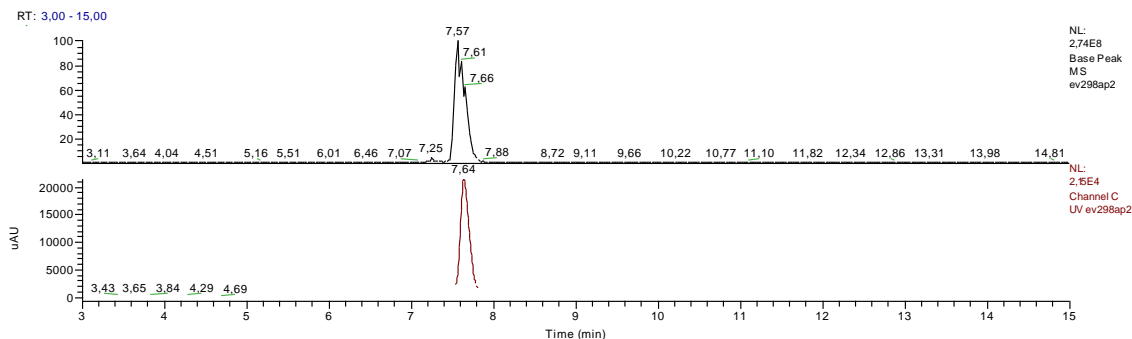

ev298ap2 #295-315 RT: 7.38-7.85 AV: 21 NL: 8.34E7  
 T: + c ESI Full ms[150.00-2000.00]

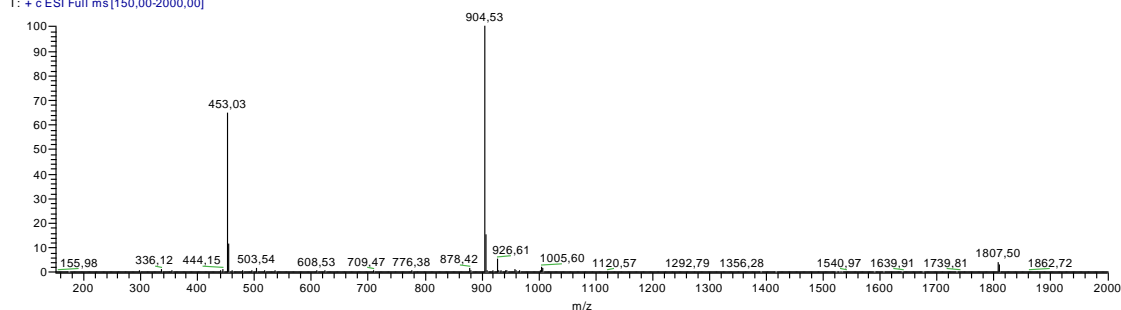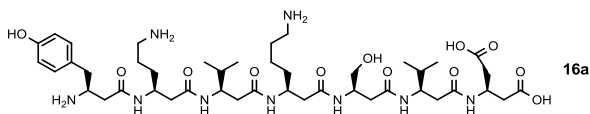

**Lin(4,7)-LysAsp 16a: calc. mass (M+H)<sup>+</sup> 922.56**

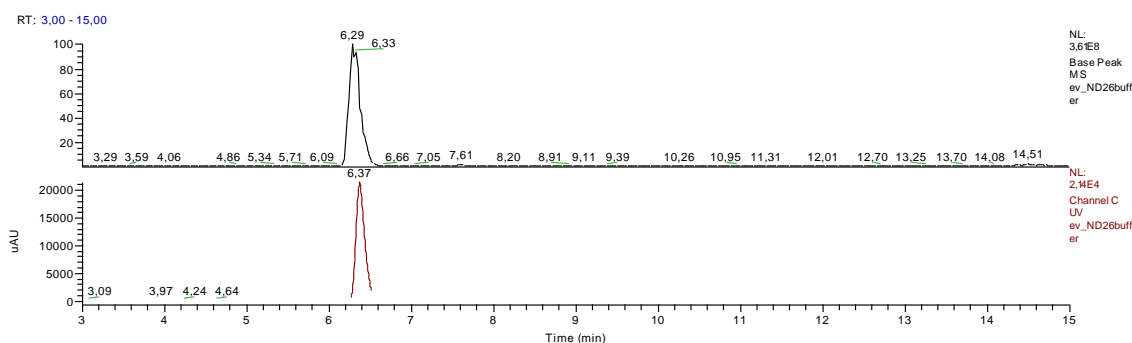

ev\_ND26buffer #245-263 RT: 6.14-6.56 AV: 19 NL: 1.36E8  
 T: + c ESI Full ms[150.00-2000.00]

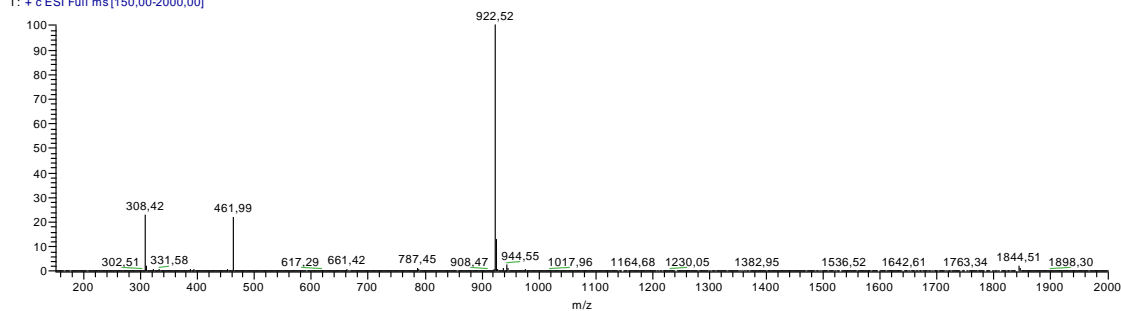

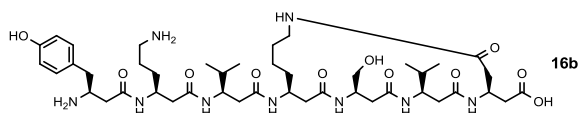

Cy(4,7)-LysAsp **16b**: calc. mass (M+H)<sup>+</sup> 904.55

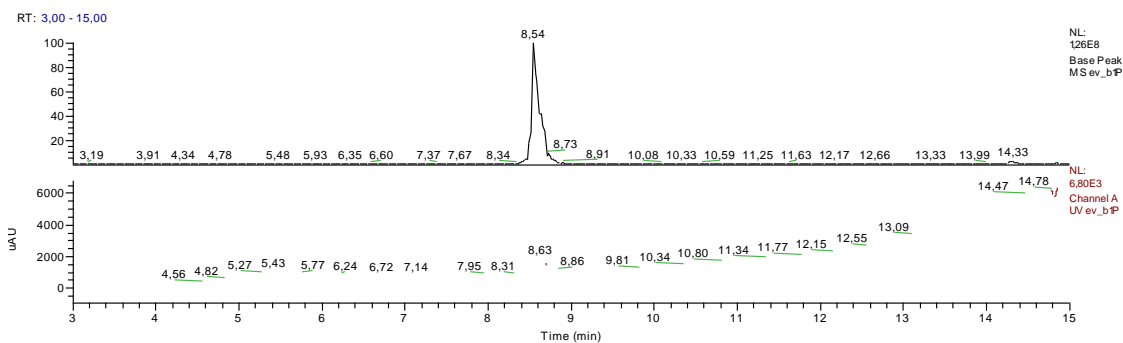

ev\_b1P #339-356 RT: 8.42-8.84 AV: 18 NL: 3.18E7  
T: + c ESI Full ms[150.00-2000.00]

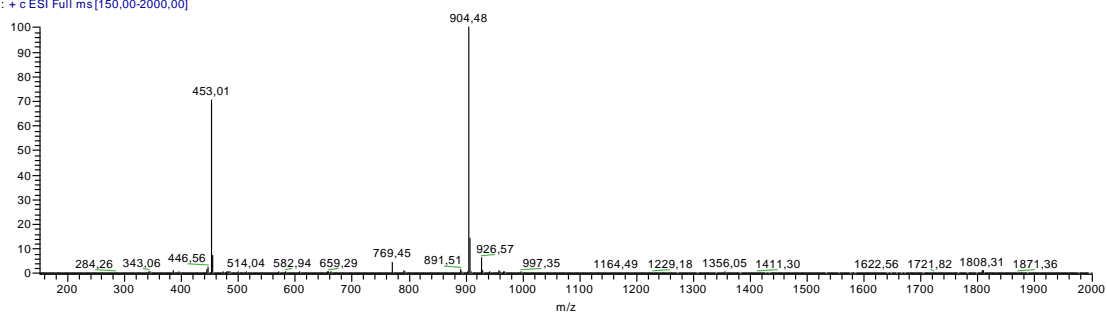

### 3. Circular Dichroism Spectroscopy

CD spectra were recorded on a JASCO-815 spectrometer at 20 °C in MeOH or in a 10 mM sodium phosphate buffer (pH 7.4) using a 0.1 cm path length CD cell. For measurements at different pH, all data were obtained from solutions in 100 mM AcOK/AcOH buffer (pH 1.75 and pH 3.6) or 50 mM NaHCO<sub>3</sub>/NaOH buffer (pH 9.6). For the evaluation of ionic strength effect in the structure stability, increasing concentrations of NaCl ranging from 0 to 1.6 M in 10 mM sodium phosphate buffer (pH 7.4) were prepared. Each peptide was analyzed at a concentration of 150-200 μM. The final concentration of the β-peptide in each MeOH and aqueous buffer solutions was determined immediately before obtaining the CD spectrum by the UV absorbance of the β<sup>3</sup>-Tyr residue using the extinction coefficient (1420 cm<sup>-1</sup> M<sup>-1</sup> at 275 nm) of α-tyrosine.<sup>5</sup> Spectra from 250 to 190 nm represent the average of 10 scans (0.5 nm data pitch, continuous scanning mode, 20 nm min<sup>-1</sup> scanning speed, 0.5 nm bandwidth, 1 s response) and were smoothed by Jasco software. Data were converted to mean-residue ellipticity MRE (in deg·cm<sup>2</sup>·dmol<sup>-1</sup>·residue<sup>-1</sup>) according to the equation:

$$\text{MRE} = \text{CD effect} / C \cdot l \cdot n_{\text{res}}$$

where the CD effect is in millidegrees, the concentration (C) is in moles per liter, the path length (l) is in millimeters and n<sub>res</sub> is the number of residues. Data for β-peptides **1-10** have been previously reported.<sup>3</sup>

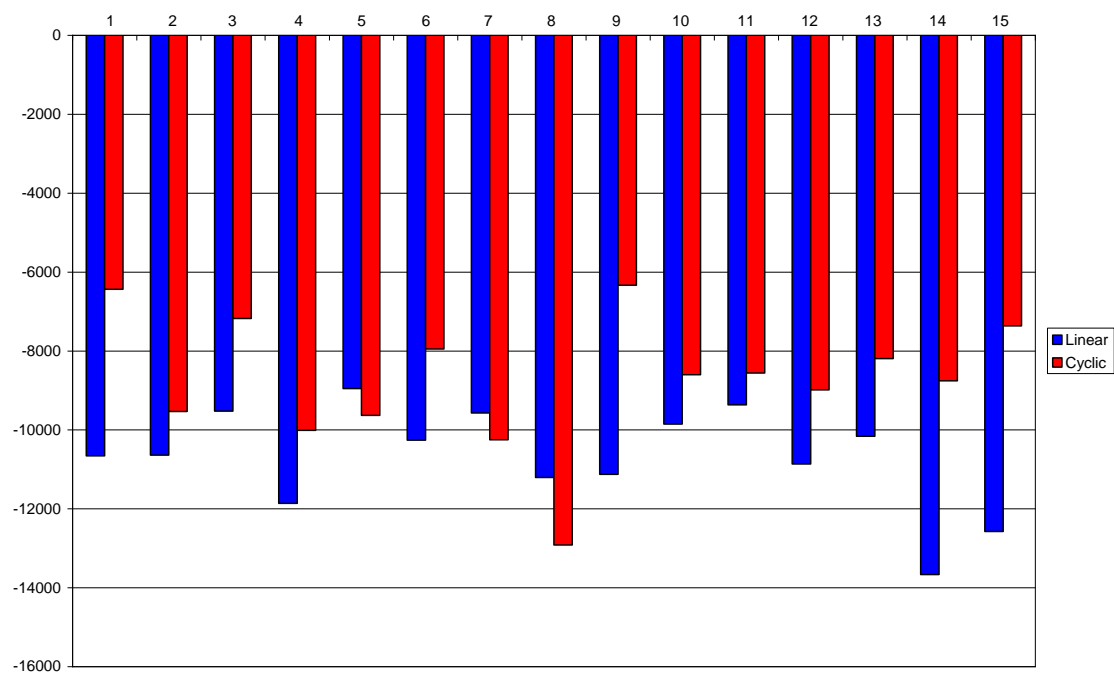

Supporting Figure: Mean residue ellipticities obtained at 215 nm in methanol for both linear (a series) and cyclic (b series)  $\beta^3$ -peptides.



#### 4. NMR characterization

NMR samples contained 1.0-2.0 mM  $\beta$ -peptide in CD<sub>3</sub>OH or in 10 mM sodium phosphate buffer (pH 7.4) with 90:10 H<sub>2</sub>O/D<sub>2</sub>O. The assignment strategy was based on the identification of individual resonance spin systems from TOCSY experiments following NOE correlations with ROESY experiments (300 ms of mixing time, optimized).

**Table S3.** <sup>1</sup>H NMR chemical shifts of the cyclic  $\beta^3$ -heptapeptide Cy(3,6)-AspLys **6b** in aqueous solution at 283 K.

|                 | H <sup>N</sup> | H <sup><math>\alpha</math></sup> <sub>ax</sub> | H <sup><math>\alpha</math></sup> <sub>eq</sub> | H <sup><math>\beta</math></sup> | H <sup><math>\gamma</math></sup> | others                                                                                                                            |
|-----------------|----------------|------------------------------------------------|------------------------------------------------|---------------------------------|----------------------------------|-----------------------------------------------------------------------------------------------------------------------------------|
| $\beta^3$ -Val1 | -              | 2.43                                           | 2.56                                           | 3.30                            | 1.81                             | $\delta$ CH <sub>3</sub> : 0.84                                                                                                   |
| $\beta^3$ -Orn2 | 8.08           | 2.25                                           | 2.32                                           | 4.06                            | 1.47, 1.52                       | $\delta$ CH <sub>2</sub> : 1.36; $\epsilon$ CH <sub>2</sub> : 2.82                                                                |
| $\beta^3$ -Asp3 | 8.17           | 2.17                                           | 2.26                                           | 4.23                            | 2.35, 2.37                       |                                                                                                                                   |
| $\beta^3$ -Val4 | 7.96           | 2.10                                           | 2.40                                           | 3.87                            | 1.58                             | $\delta$ CH <sub>3</sub> : 0.72                                                                                                   |
| $\beta^3$ -Ser5 | 7.94           | 2.08                                           | 2.27                                           | 4.01                            | 3.38                             |                                                                                                                                   |
| $\beta^3$ -Lys6 | 7.70           | 2.03                                           | 2.15                                           | 3.76                            | 1.01, 0.92                       | $\delta$ CH <sub>2</sub> : 1.09, 1.14; $\epsilon$ CH <sub>2</sub> : 1.26<br>$\zeta$ CH <sub>2</sub> : 2.96, 3.11; $\eta$ NH: 7.98 |
| $\beta^3$ -Tyr7 | 7.82           | 2.18                                           | 2.24                                           | 4.24                            | 2.39, 2.71                       | $\epsilon$ H: 6.97; $\zeta$ H: 6.65                                                                                               |

**Table S4.** <sup>1</sup>H NMR chemical shifts of the cyclic  $\beta^3$ -heptapeptide Cy(3,6)-AspLys **6b** in MeOH solution at 283 K.

|                 | H <sup>N</sup> | H <sup><math>\alpha</math></sup> <sub>ax</sub> | H <sup><math>\alpha</math></sup> <sub>eq</sub> | H <sup><math>\beta</math></sup> | H <sup><math>\gamma</math></sup> | others                                                                                                                      |
|-----------------|----------------|------------------------------------------------|------------------------------------------------|---------------------------------|----------------------------------|-----------------------------------------------------------------------------------------------------------------------------|
| $\beta^3$ -Val1 | -              | 3.00                                           | 2.57                                           | 3.49                            | 2.06                             | $\delta$ CH <sub>3</sub> : 1.07                                                                                             |
| $\beta^3$ -Orn2 | 8.26           | 2.96                                           | 2.32                                           | 4.52                            | 1.65                             | $\delta$ CH <sub>2</sub> : 1.54; $\epsilon$ CH <sub>2</sub> : 2.89                                                          |
| $\beta^3$ -Asp3 | 8.94           | 3.12                                           | 2.50                                           | 4.46                            | 2.19, 2.67                       |                                                                                                                             |
| $\beta^3$ -Val4 | 8.32           | 2.62                                           | 2.39                                           | 4.25                            | 1.76                             | $\delta$ CH <sub>3</sub> : 0.94                                                                                             |
| $\beta^3$ -Ser5 | 8.17           | 2.37                                           | 2.44                                           | 4.42                            | 3.48                             |                                                                                                                             |
| $\beta^3$ -Lys6 | 7.60           | 2.18                                           | 2.40                                           | 4.29                            | 1.20, 1.69                       | $\delta$ CH <sub>2</sub> : 1.34; $\epsilon$ CH <sub>2</sub> : 1.45<br>$\zeta$ CH <sub>2</sub> : 2.75, 3.79; $\eta$ NH: 7.98 |
| $\beta^3$ -Tyr7 | 7.46           | 2.11                                           | 2.40                                           | 4.50                            | 2.59                             | $\epsilon$ H: 6.95; $\zeta$ H: 6.63                                                                                         |

**Table S5.**  $^1\text{H}$  NMR chemical shifts of the cyclic  $\beta^3$ -heptapeptide Cy(1,4)-LysAsp **12b** in MeOH at 283 K.

|                 | $\text{H}^{\text{N}}$ | $\text{H}^{\alpha}_{\text{ax}}$ | $\text{H}^{\alpha}_{\text{eq}}$ | $\text{H}^{\beta}$ | $\text{H}^{\gamma}$ | others                                                                                                           |
|-----------------|-----------------------|---------------------------------|---------------------------------|--------------------|---------------------|------------------------------------------------------------------------------------------------------------------|
| $\beta^3$ -Lys1 | -                     | 2.98                            | 2.61                            | 3.71               | 1.36, 1.88          | $\delta\text{CH}_2$ : 1.64; $\epsilon\text{CH}_2$ : 1.54 $\zeta\text{CH}_2$ : 3.09, 3.48; $\eta\text{NH}$ : 8.09 |
| $\beta^3$ -Val2 | 8.24                  | 2.82                            | 2.47                            | 4.17               | 1.79                | $\delta\text{CH}_3$ : 0.94                                                                                       |
| $\beta^3$ -Orn3 | 8.23                  | 2.53                            | 2.44                            | 4.25               | 1.62                | $\delta\text{CH}_2$ : 1.48; $\epsilon\text{CH}_2$ : 2.85, 2.91                                                   |
| $\beta^3$ -Asp4 | 8.55                  | 2.79                            | 2.52                            | 4.61               | 2.27, 2.32          |                                                                                                                  |
| $\beta^3$ -Val5 | 8.25                  | 2.40                            | 2.40                            | 4.16               | 1.69                | $\delta\text{CH}_3$ : 0.87                                                                                       |
| $\beta^3$ -Ser6 | 7.87                  | 2.30                            | 2.50                            | 4.29               | 3.35, 3.47          |                                                                                                                  |
| $\beta^3$ -Tyr7 | 7.70                  | 2.15                            | 2.43                            | 4.46               | 2.60, 2.65          | $\epsilon\text{H}$ : 7.00; $\zeta\text{H}$ : 6.64                                                                |

**Table S6.**  $^1\text{H}$  NMR chemical shifts of the cyclic  $\beta^3$ -heptapeptide Cy(1,4)-LysAsp **12b** in MeOH at 271 K.

|                 | $\text{H}^{\text{N}}$ | $\text{H}^{\alpha}_{\text{ax}}$ | $\text{H}^{\alpha}_{\text{eq}}$ | $\text{H}^{\beta}$ | $\text{H}^{\gamma}$ | others                                                                                                           |
|-----------------|-----------------------|---------------------------------|---------------------------------|--------------------|---------------------|------------------------------------------------------------------------------------------------------------------|
| $\beta^3$ -Lys1 | -                     | 2.99                            | 2.61                            | 3.71               | 1.36, 1.88          | $\delta\text{CH}_2$ : 1.63; $\epsilon\text{CH}_2$ : 1.55 $\zeta\text{CH}_2$ : 3.08, 3.49; $\eta\text{NH}$ : 8.16 |
| $\beta^3$ -Val2 | 8.27                  | 2.82                            | 2.49                            | 4.17               | 1.79                | $\delta\text{CH}_3$ : 0.94                                                                                       |
| $\beta^3$ -Orn3 | 8.28                  | 2.54                            | 2.45                            | 4.25               | 1.62                | $\delta\text{CH}_2$ : 1.47; $\epsilon\text{CH}_2$ : 2.85, 2.90                                                   |
| $\beta^3$ -Asp4 | 8.58                  | 2.79                            | 2.51                            | 4.60               | 2.28, 2.32          |                                                                                                                  |
| $\beta^3$ -Val5 | 8.25                  | 2.35                            | 2.41                            | 4.14               | 1.68                | $\delta\text{CH}_3$ : 0.87                                                                                       |
| $\beta^3$ -Ser6 | 7.95                  | 2.30                            | 2.50                            | 4.28               | 3.34, 3.46          |                                                                                                                  |
| $\beta^3$ -Tyr7 | 7.79                  | 2.15                            | 2.42                            | 4.45               | 2.59, 2.65          | $\epsilon\text{H}$ : 7.00; $\zeta\text{H}$ : 6.63                                                                |

### Lin(2,5)-LysAsp **8a**

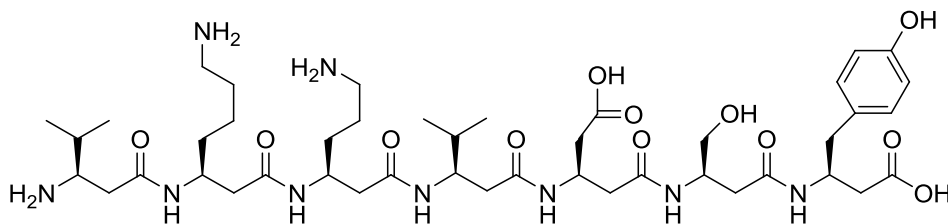

$^1\text{H-NMR}$  (MeOH, 10 °C)

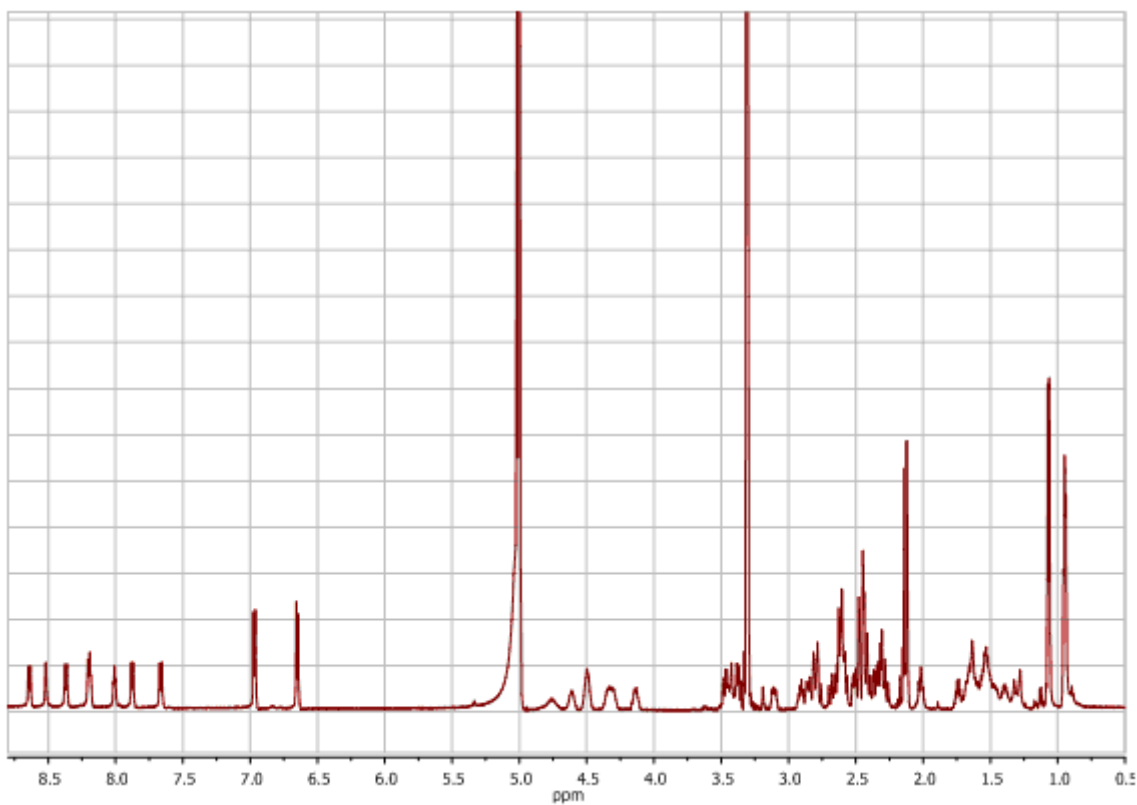

$^1\text{H-NMR}$  (MeOH, 10 °C)

Amide region

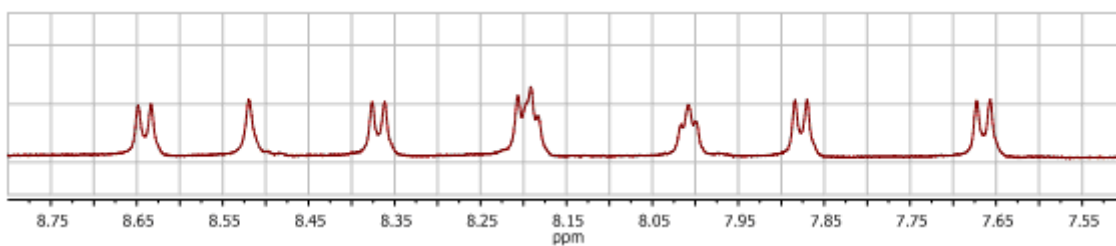

### Lin(2,5)-LysAsp **8a**

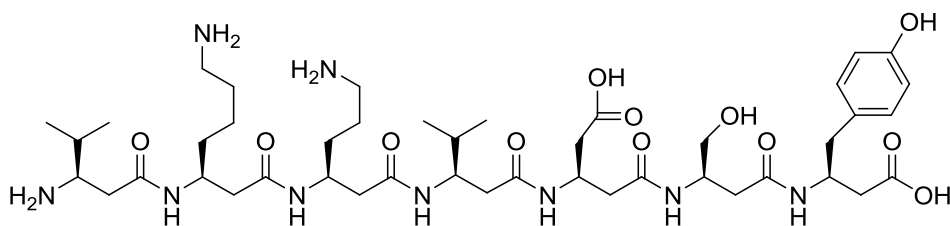

$^1\text{H-NMR}$  (pH 7.4, 10 °C)

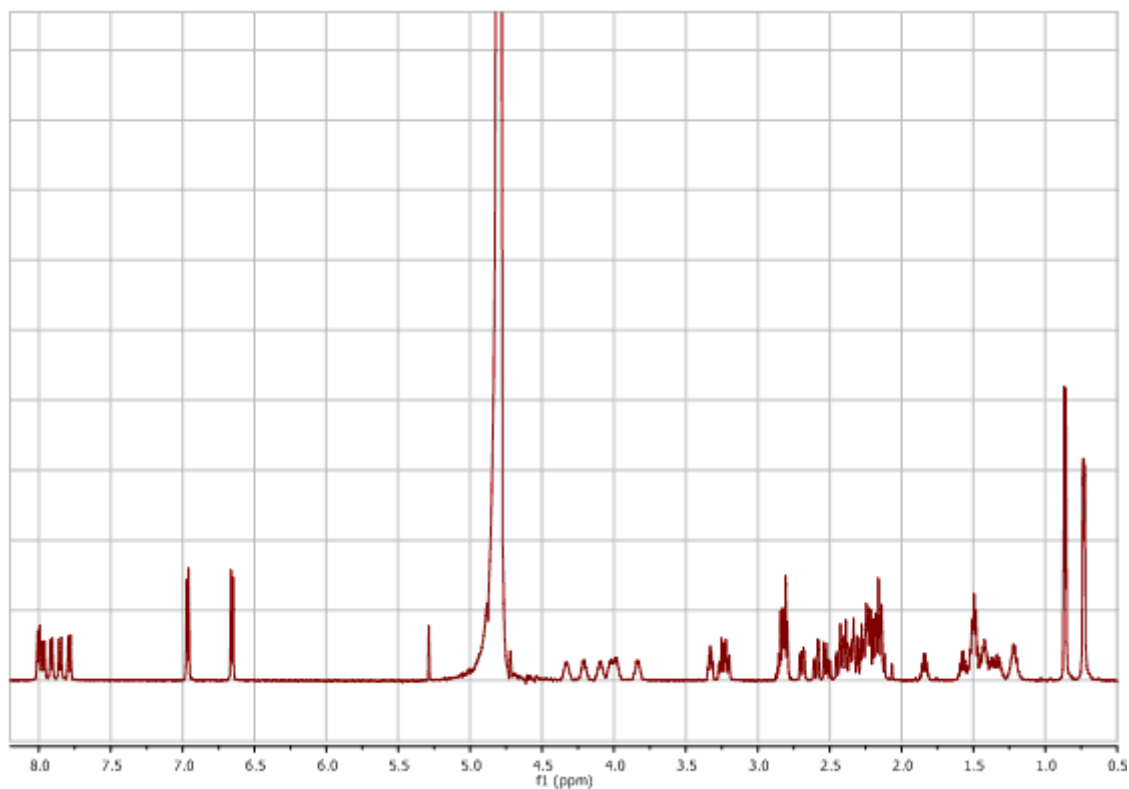

$^1\text{H-NMR}$  (pH 7.4, 10 °C)

Amide region

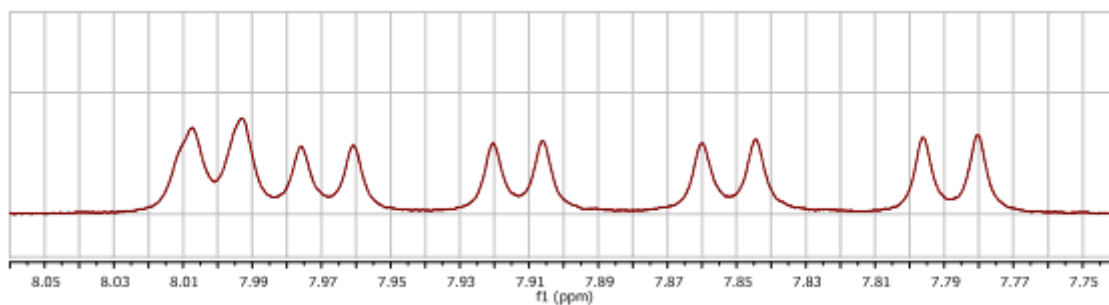

Lin(2,5)-LysAsp **8a**

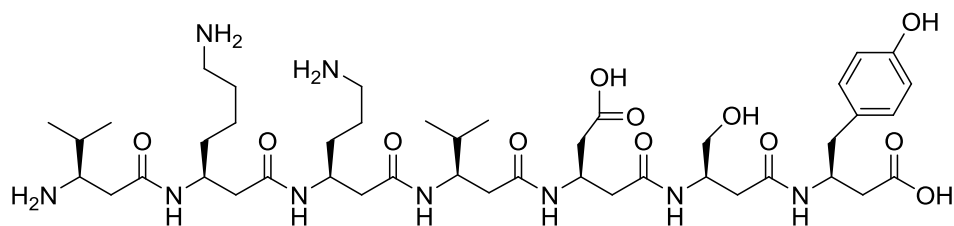

ROESY (pH 7.4, 10 °C, 300ms mixing time)  
Amide proton region

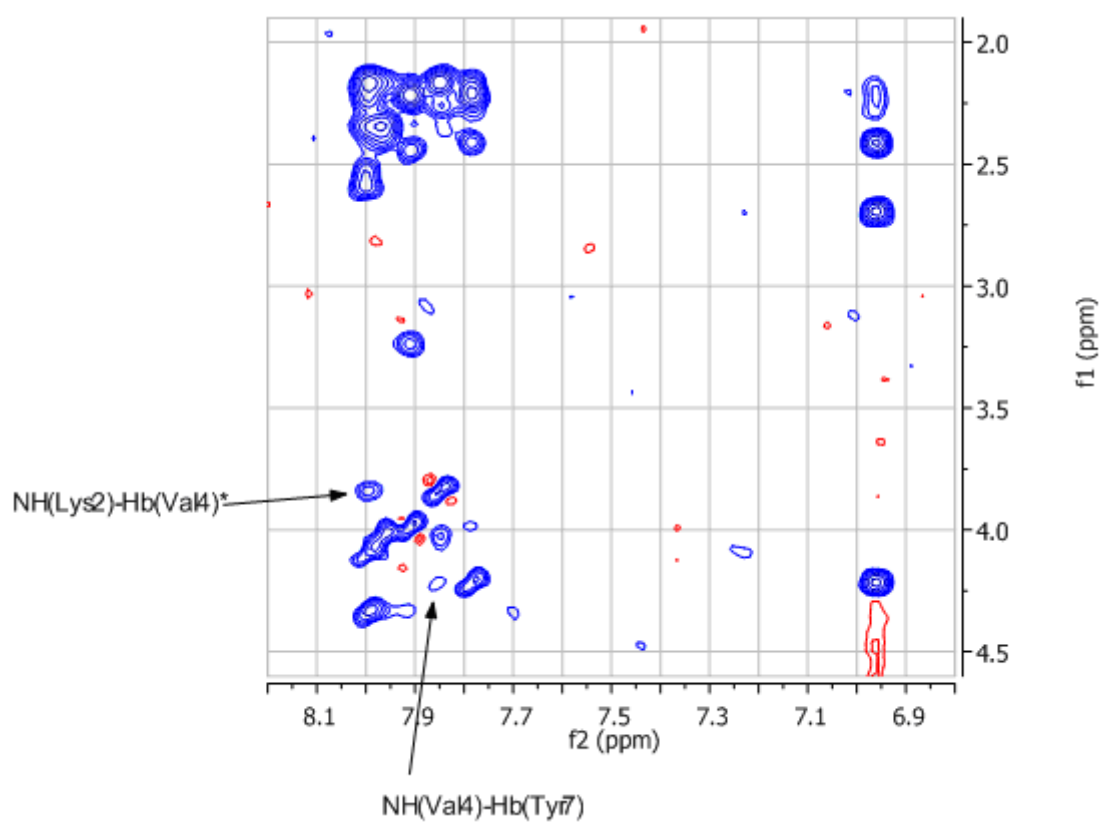

\* ambiguously assigned.

### Lin(2,5)-LysAsp **8a**

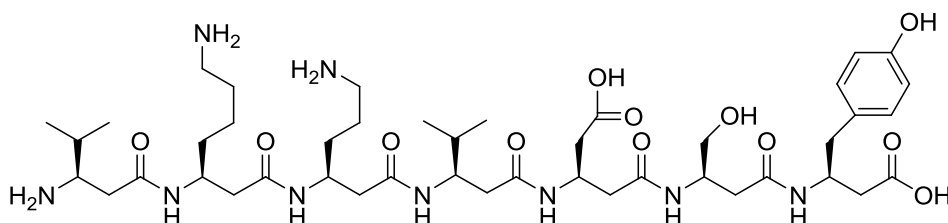

ROESY (pH 7.4, 10 °C, 300ms mixing time)  
Aliphatic region

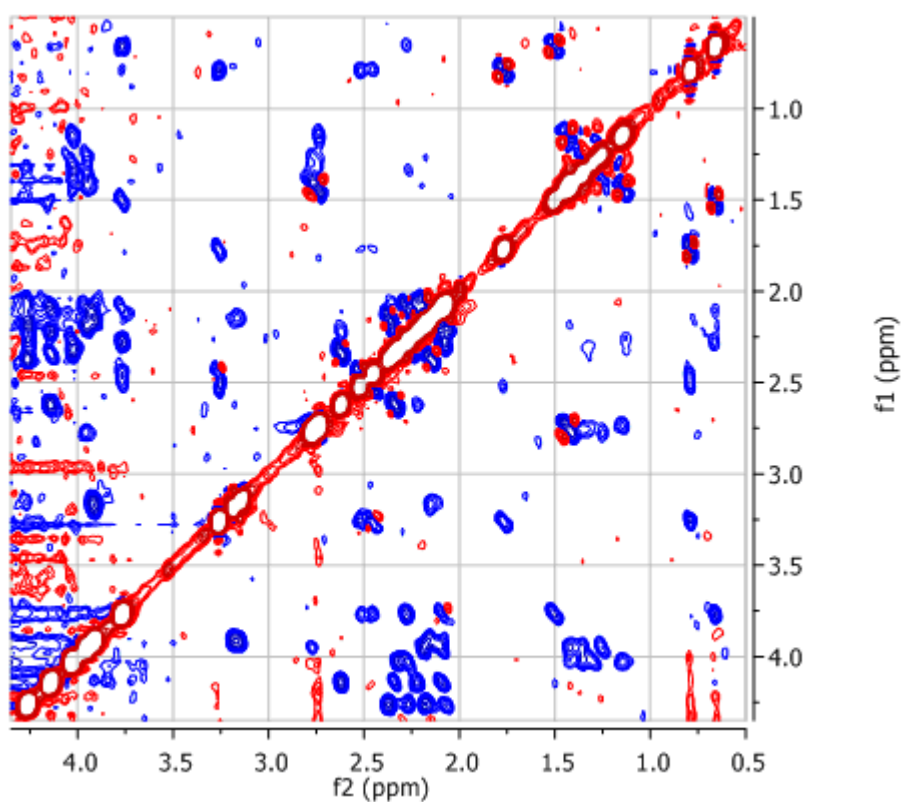

None of the NOE signals corresponded to long-range correlations between residues (i, i+2) or (i, i+3).

Lin(2,5)-LysAsp **8a**

TOCSY (pH 7.4, 10 °C) Amide proton region

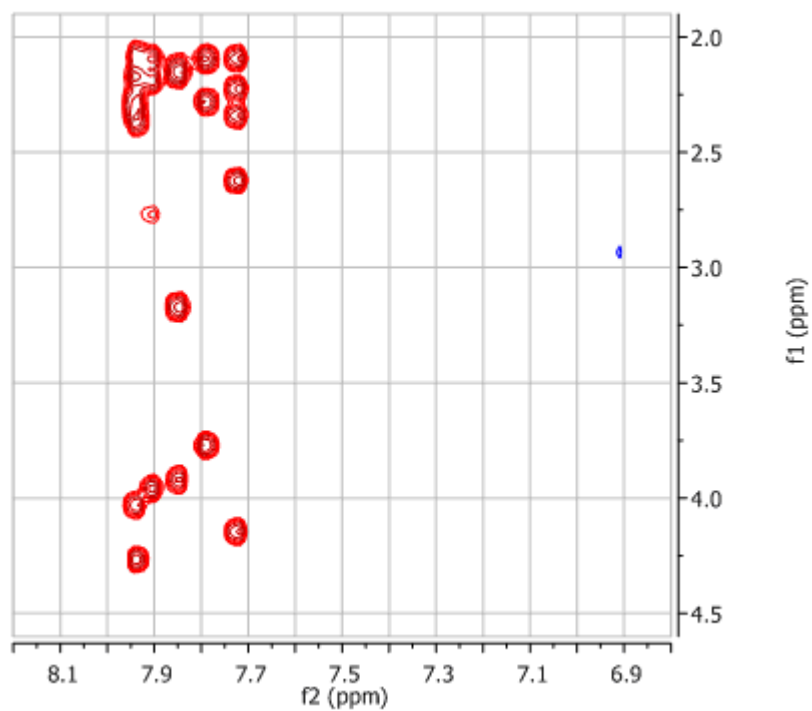

TOCSY (pH 7.4, 10 °C) Aliphatic region

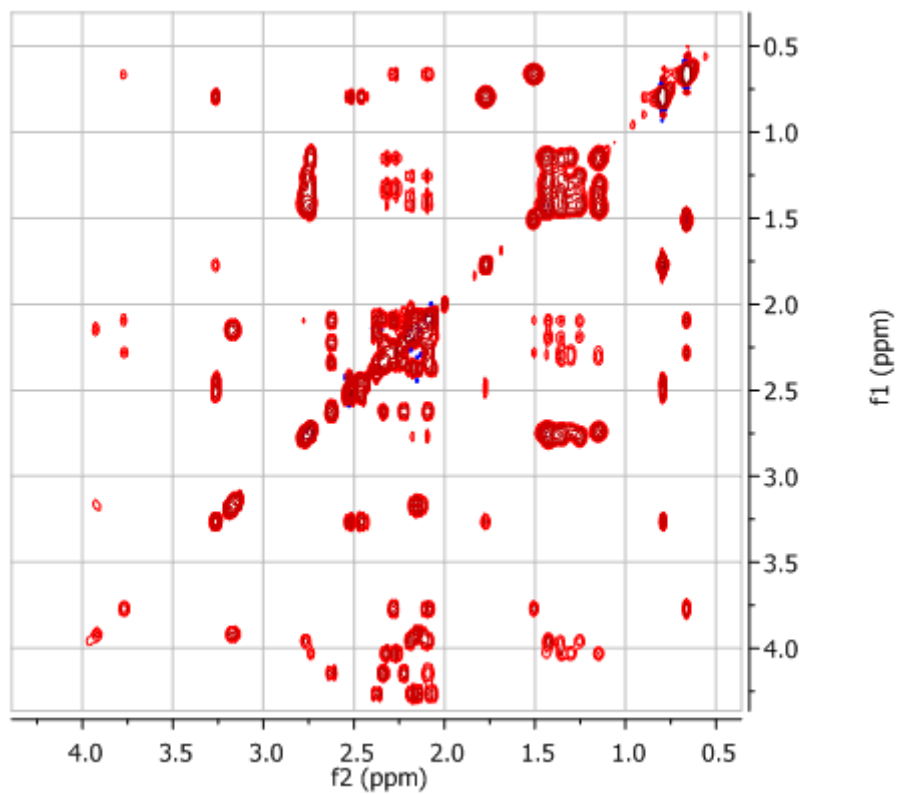

Cy(2,5)-LysAsp **8b**

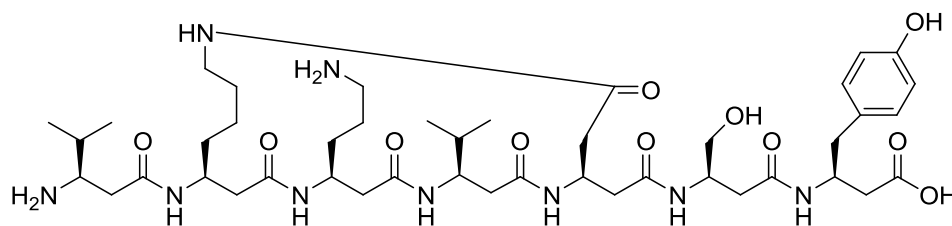

$^1\text{H-NMR}$  (pH 7.4, 10 °C)

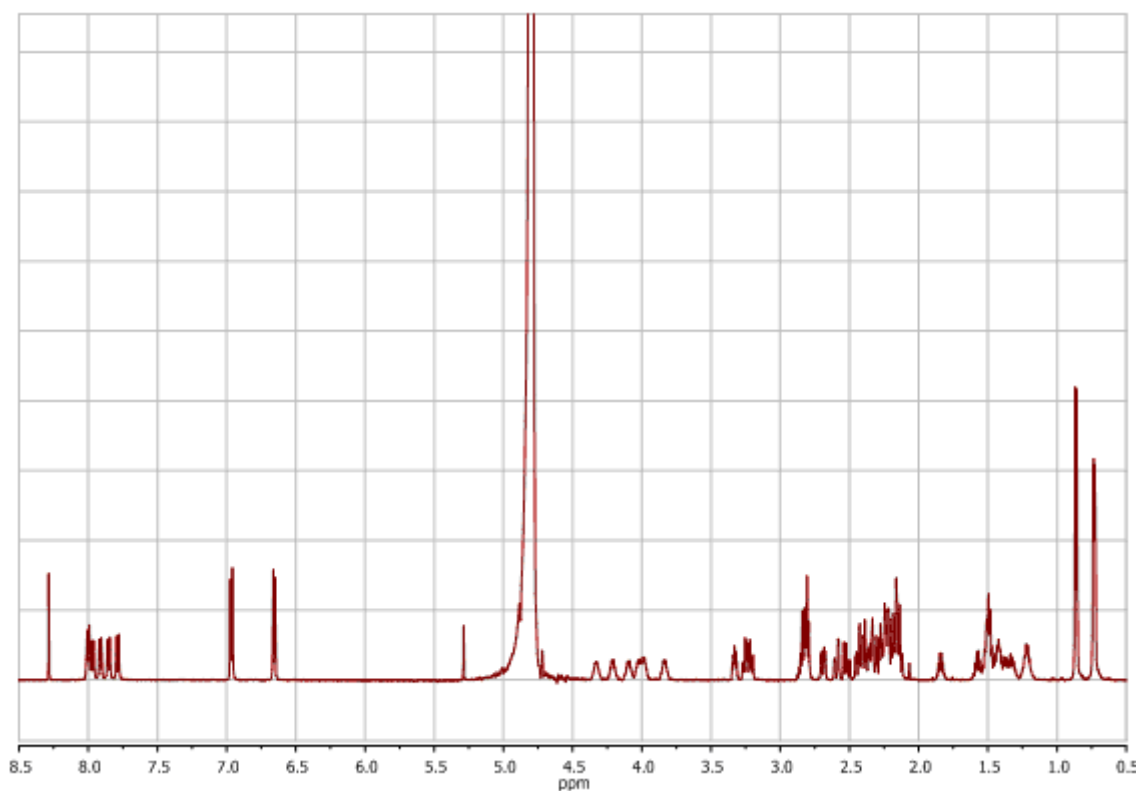

$^1\text{H-NMR}$  (pH 7.4, 10 °C)  
Amide proton region

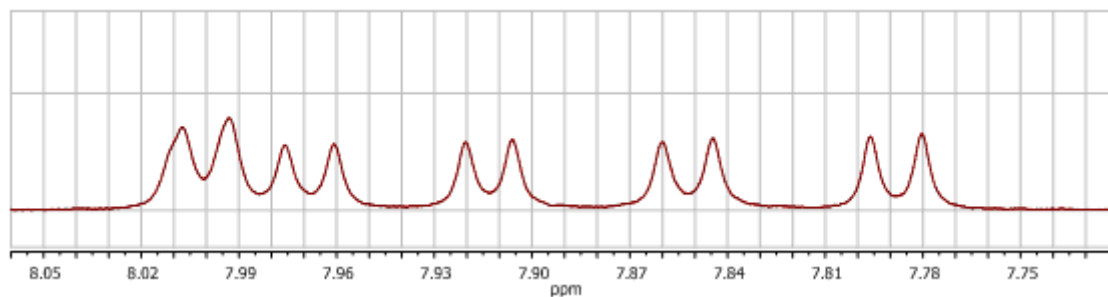



Cy(2,5)-LysAsp **8b**



ROESY (pH 7.4, 10 °C, 300ms mixing time)

Amide proton region

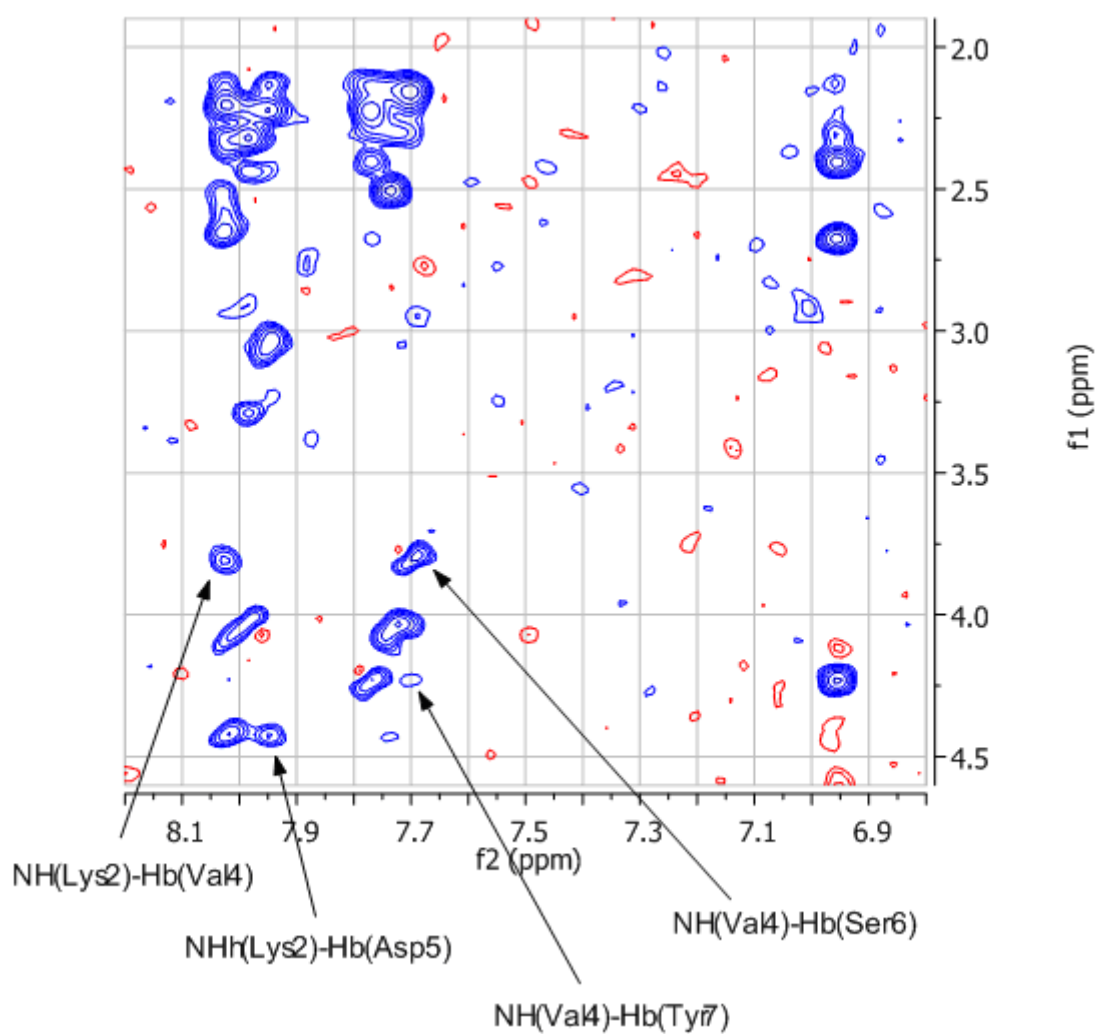

### Cy(2,5)-LysAsp **8b**

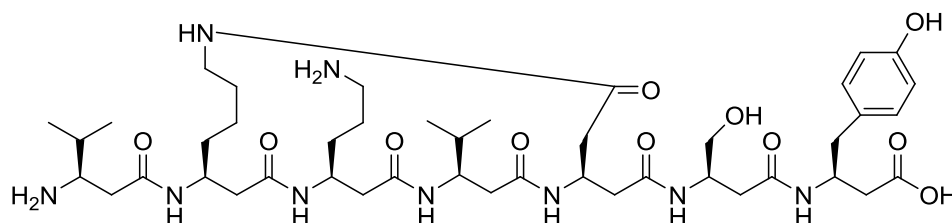

ROESY (pH 7.4, 10 °C, 300ms mixing time)  
Aliphatic region

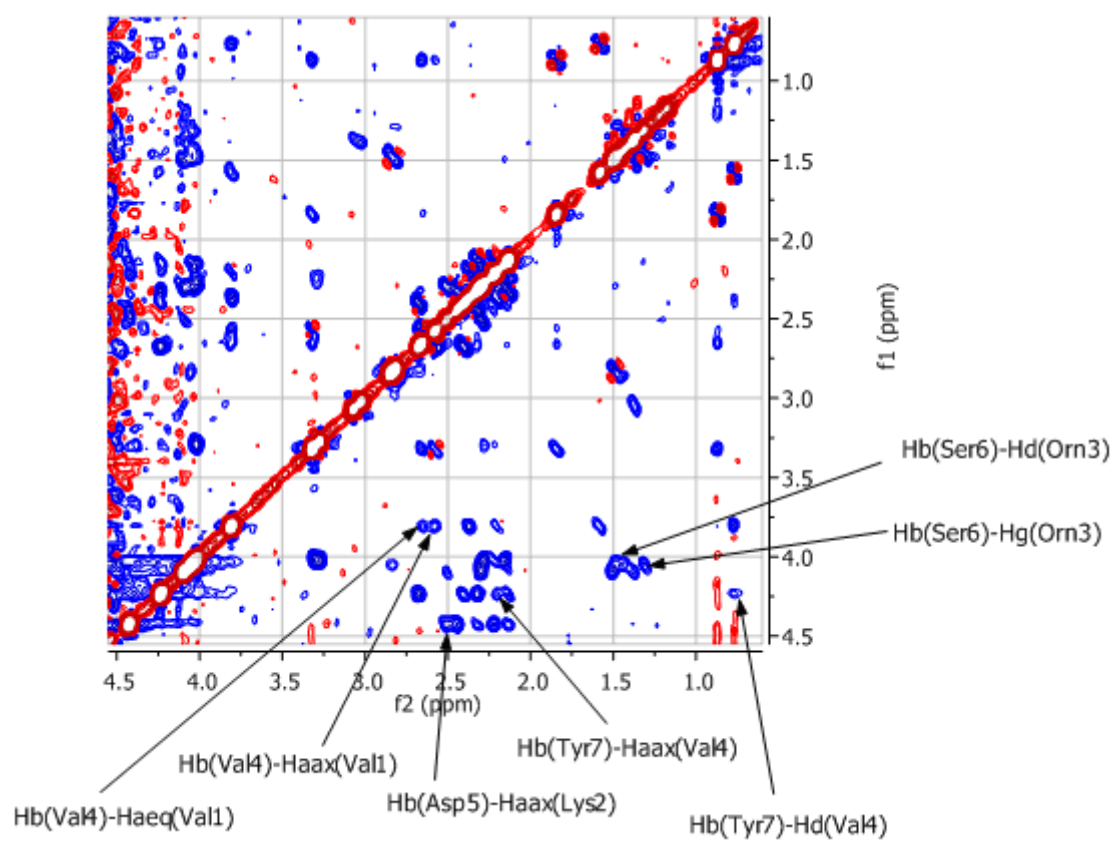

### Cy(2,5)-LysAsp **8b**



ROESY (pH 7.4, 10 °C, 300ms mixing time)  
Aliphatic region

(NOE correlations with the side-chains)

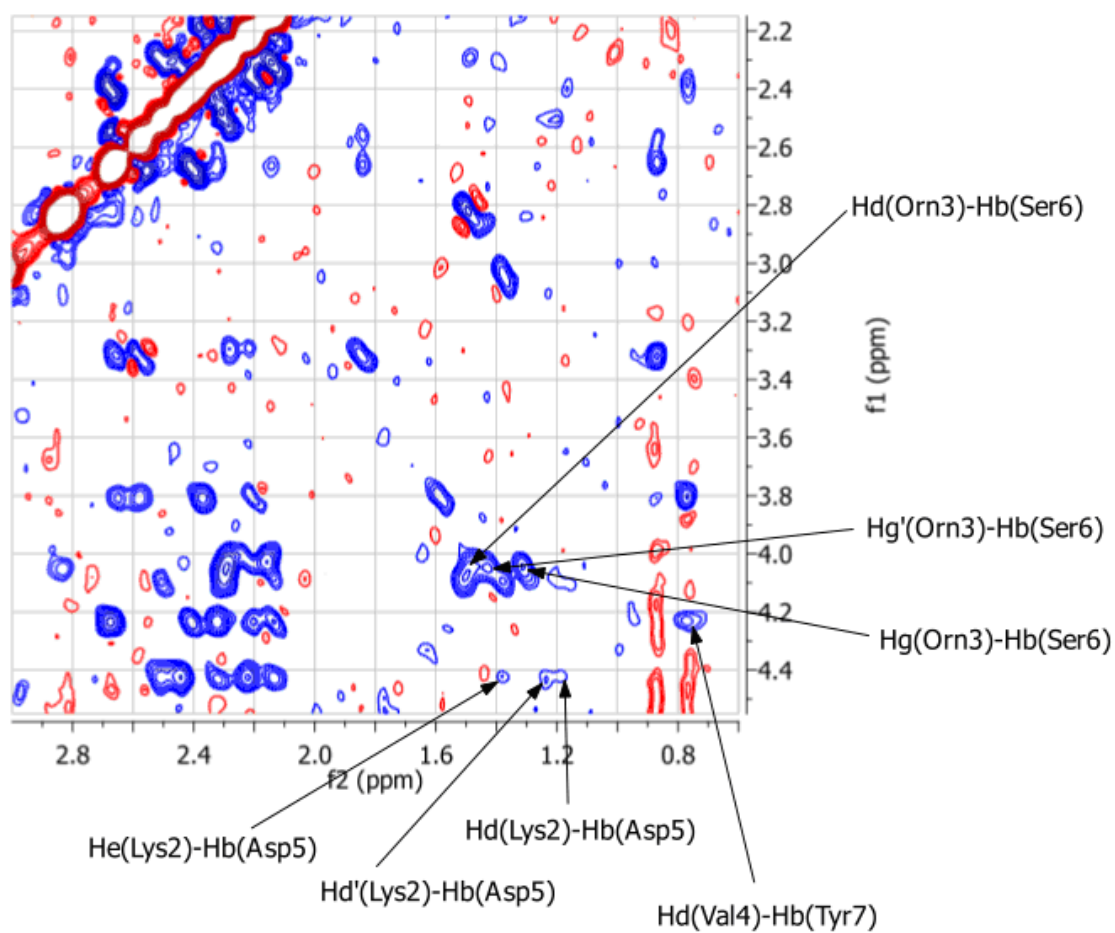

**8b**

TOCSY (pH 7.4, 10 °C) Amide proton region

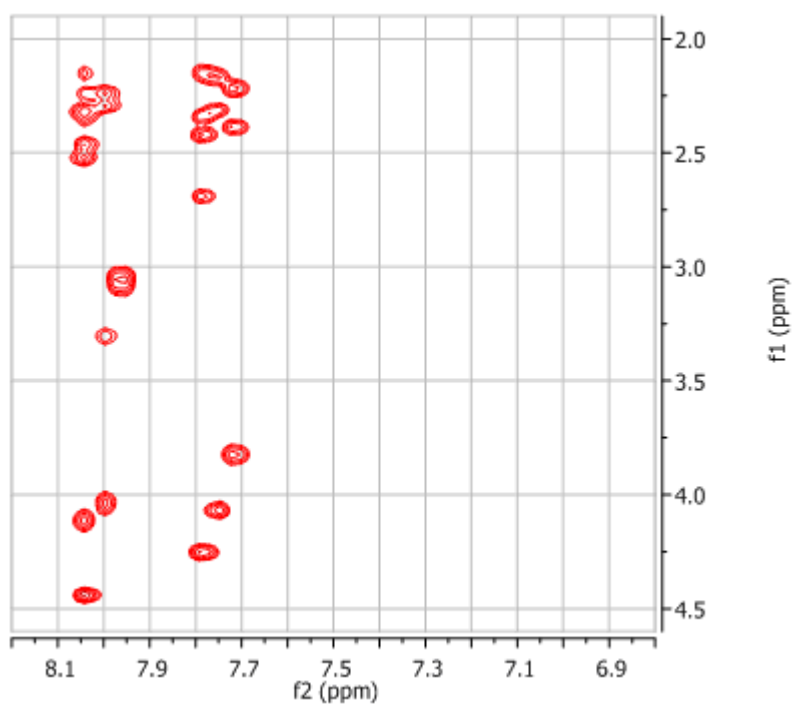

TOCSY (pH 7.4, 10 °C) Aliphatic region

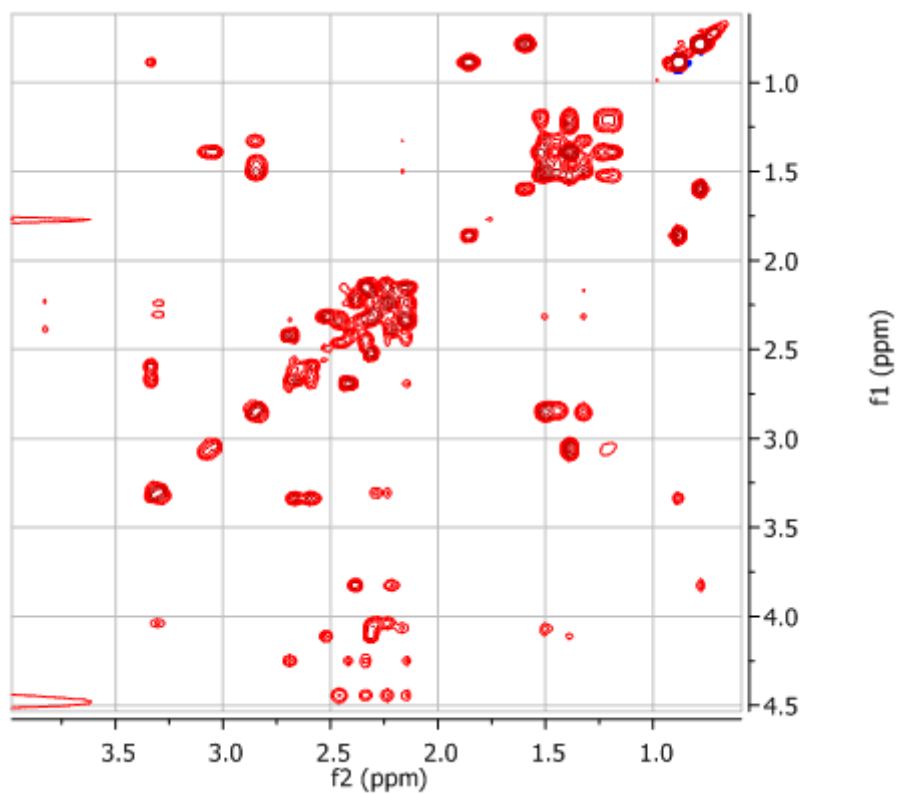

### Cy(2,5)-LysAsp **8b**

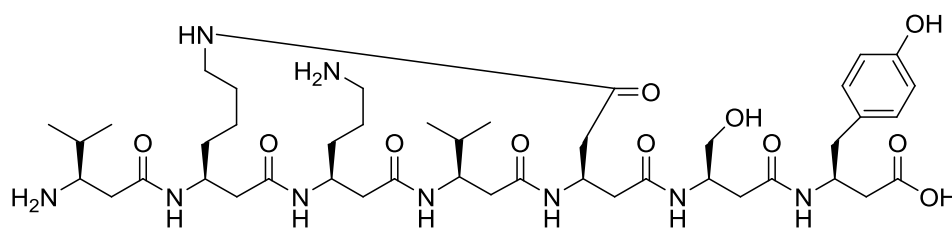

### <sup>1</sup>H-NMR (MeOH, 10 °C)

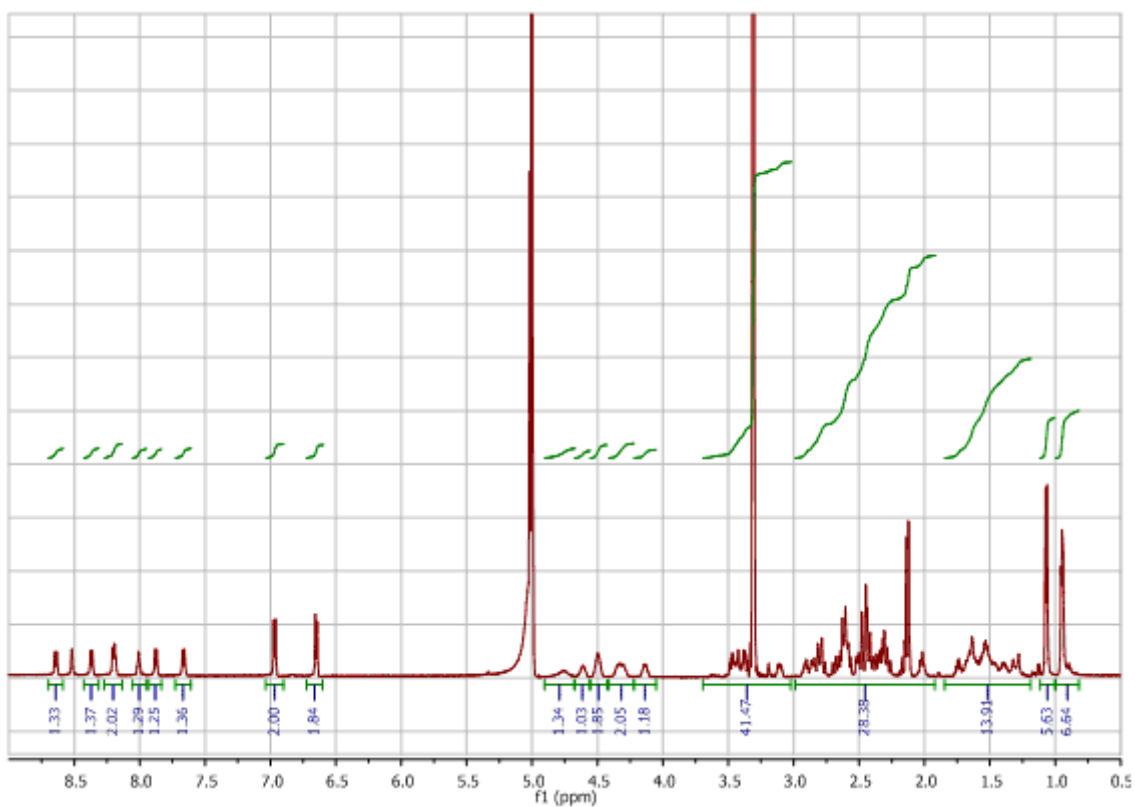

### <sup>1</sup>H-NMR (MeOH, 10 °C)

#### Amide protons

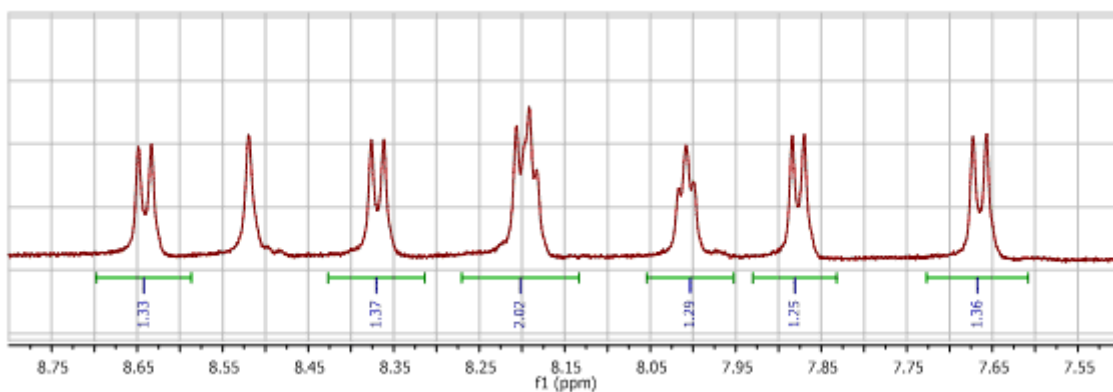

**8b**

ROESY (MeOH, 10 °C, 300ms mixing time)  
Amide proton region

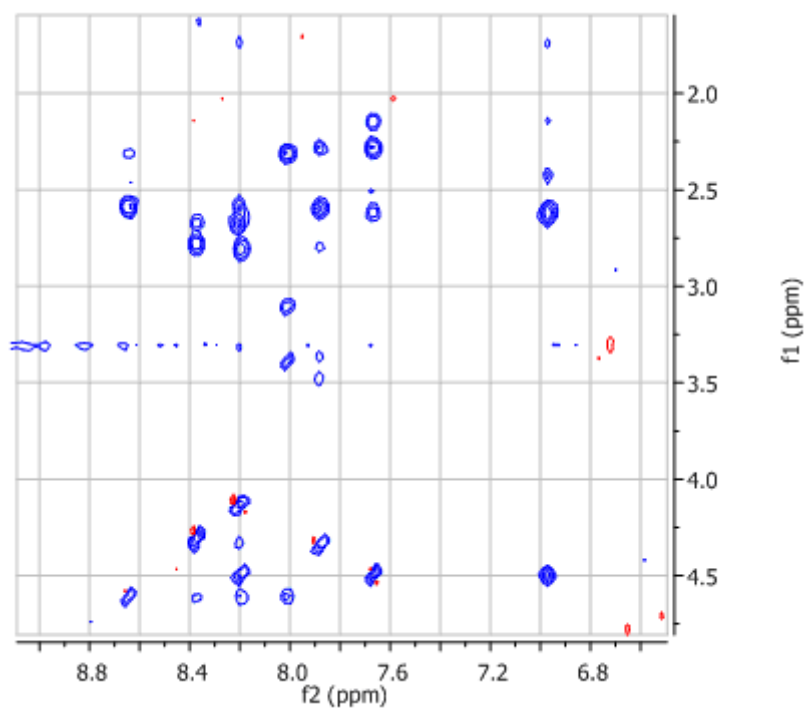

ROESY (MeOH, 10 °C, 300ms mixing time)  
Aliphatic region

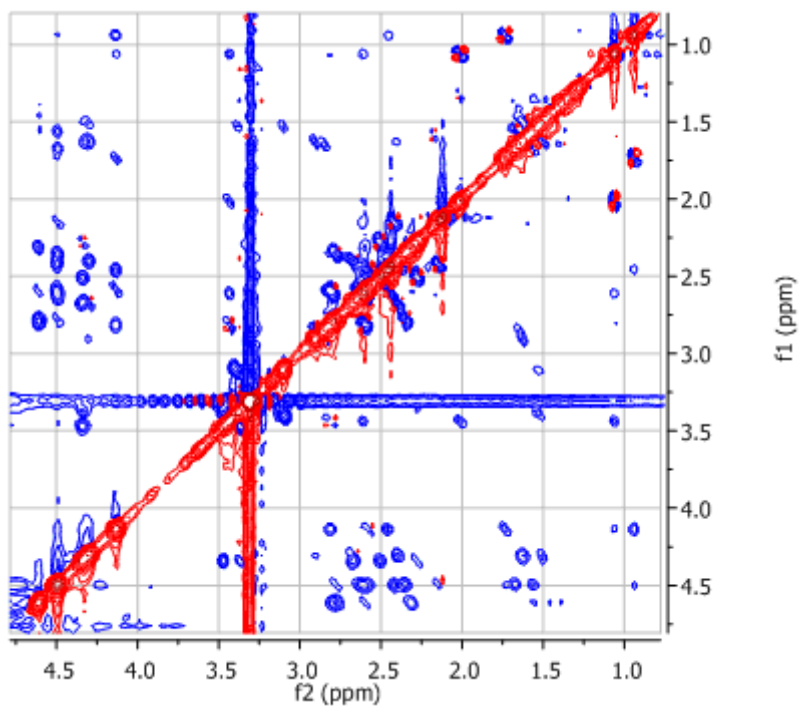

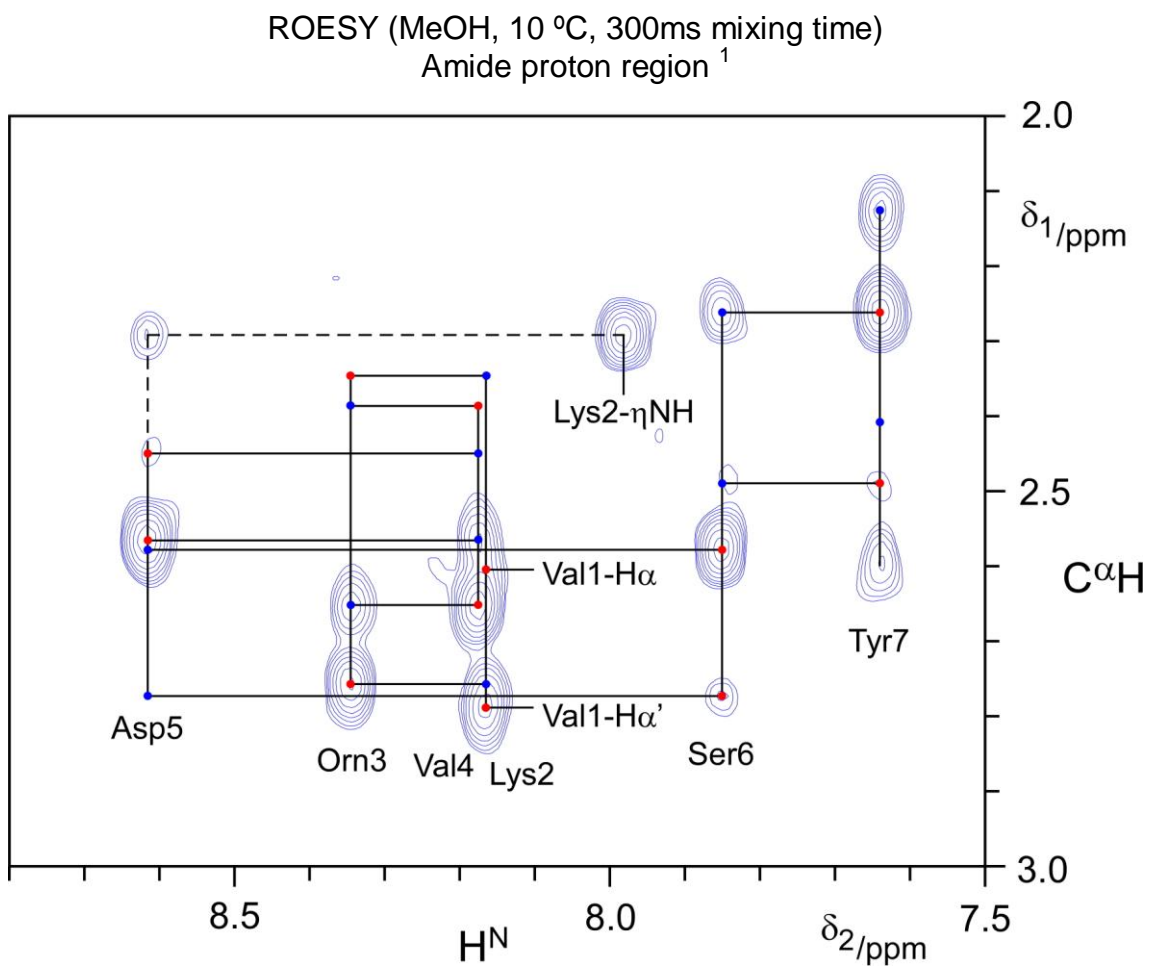

<sup>1</sup> At each  $\text{H}^{\text{N}}$  resonance line, blue dots indicate intra-residual ( $i,i$ ) cross peaks, whereas red dots indicate inter-residual cross peaks that correspond to contacts of the  $\text{H}^{\text{N}}$  resonance to  $\text{H}^\alpha_{\text{axial}}$  and  $\text{H}^\alpha_{\text{equatorial}}$  atoms of the preceding ( $i-1,i$ ) amino acid.

**8b**

TOCSY (MeOH, 10 °C) Amide proton region

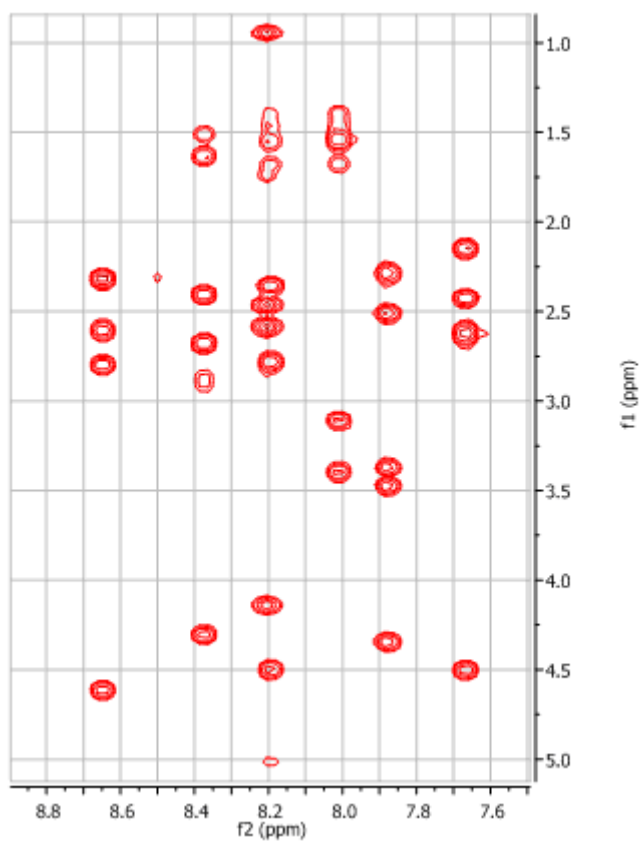

TOCSY (MeOH, 10 °C) Aliphatic region

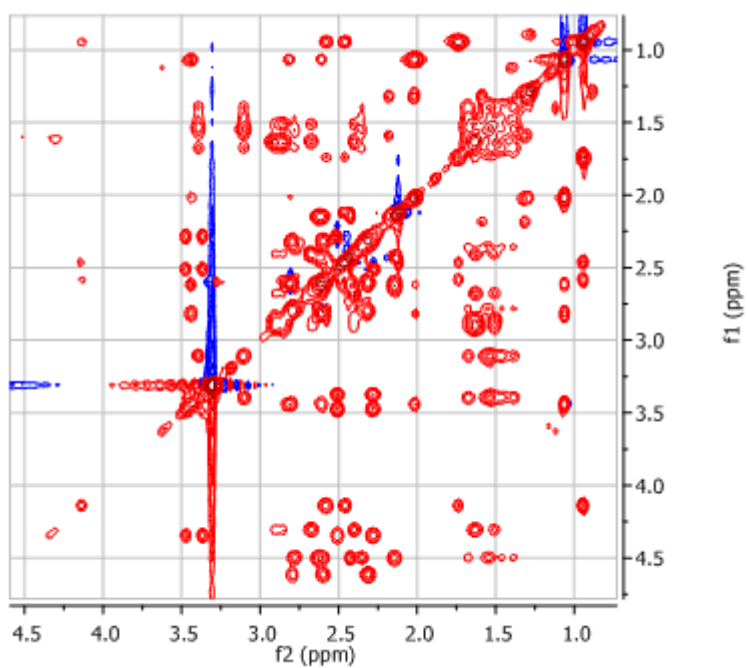



### Cy(1,4)-LysAsp 12b

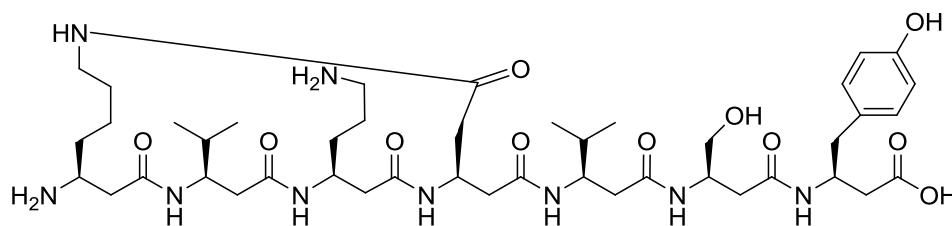

### <sup>1</sup>H-NMR (MeOH, -2 °C)

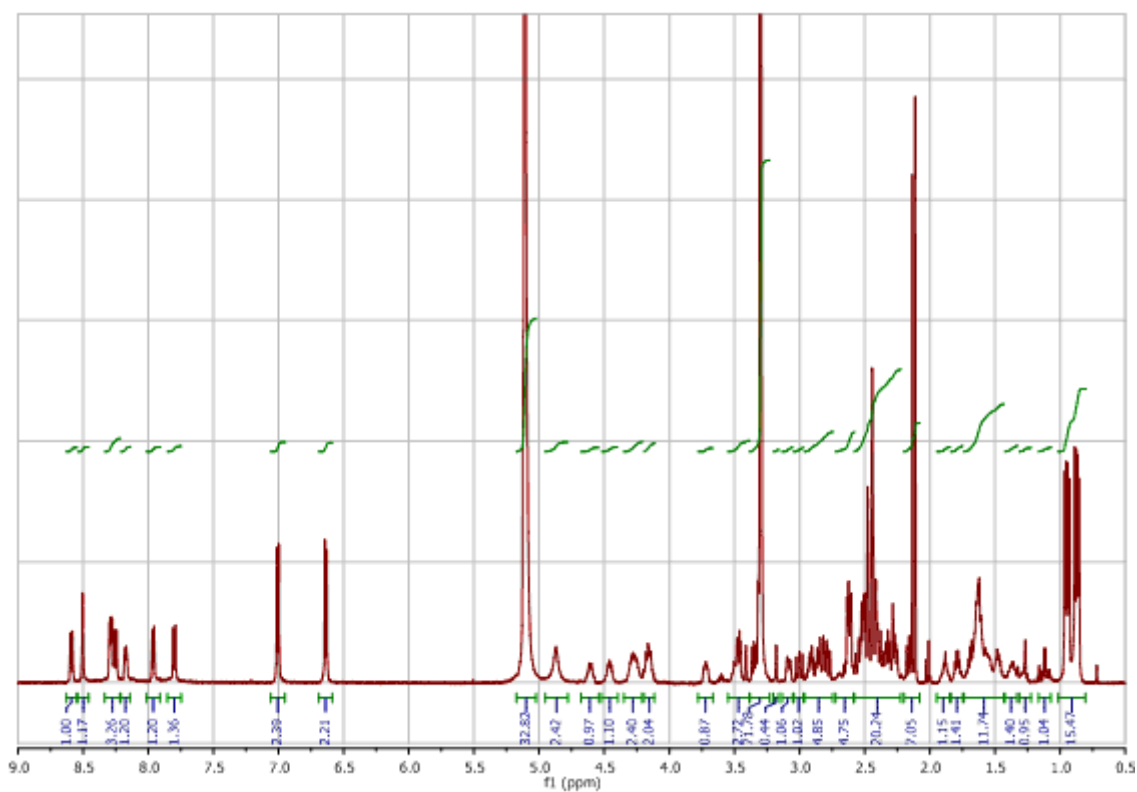

### <sup>1</sup>H-NMR (MeOH, 10 °C) Amide protons

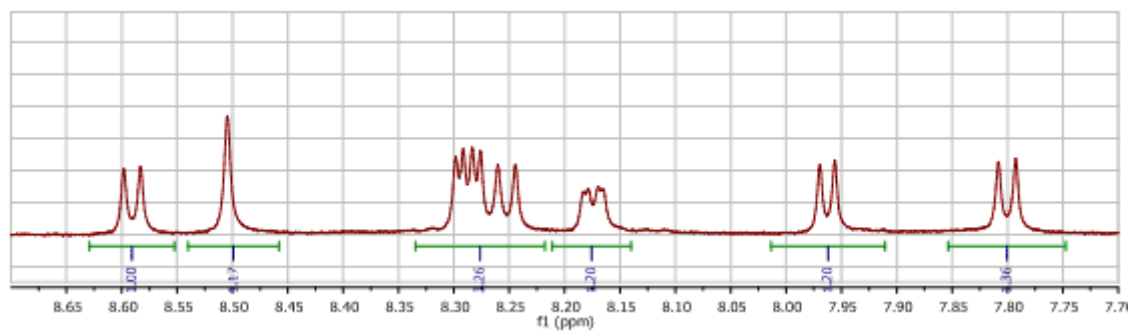

**12b**

ROESY (MeOH, -2 °C, 300ms mixing time)  
Amide proton region

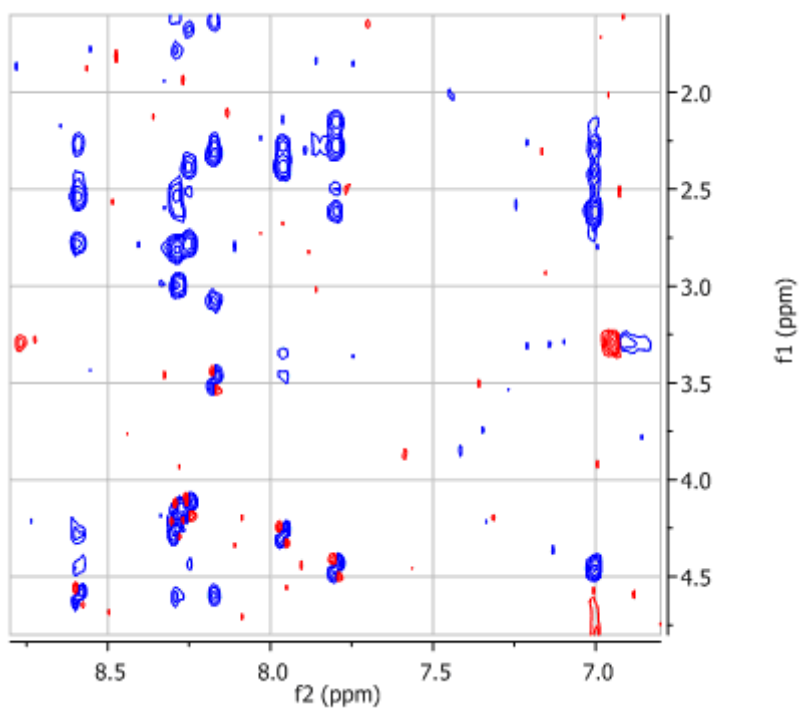

ROESY (MeOH, -2 °C, 300ms mixing time)  
Aliphatic region

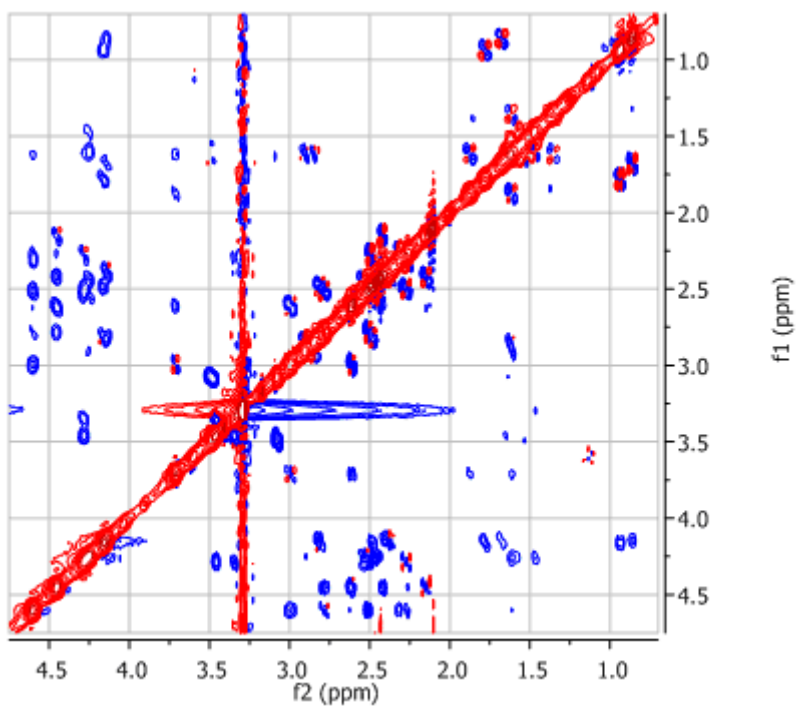

**12b**

TOCSY (MeOH, -2 °C) Amide proton region

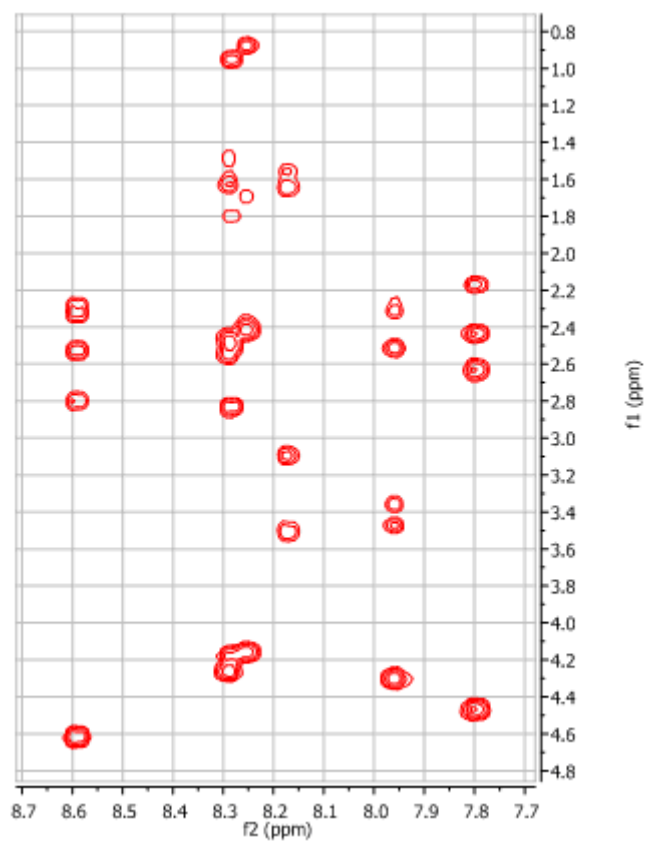

TOCSY (MeOH, -2 °C) Aliphatic region

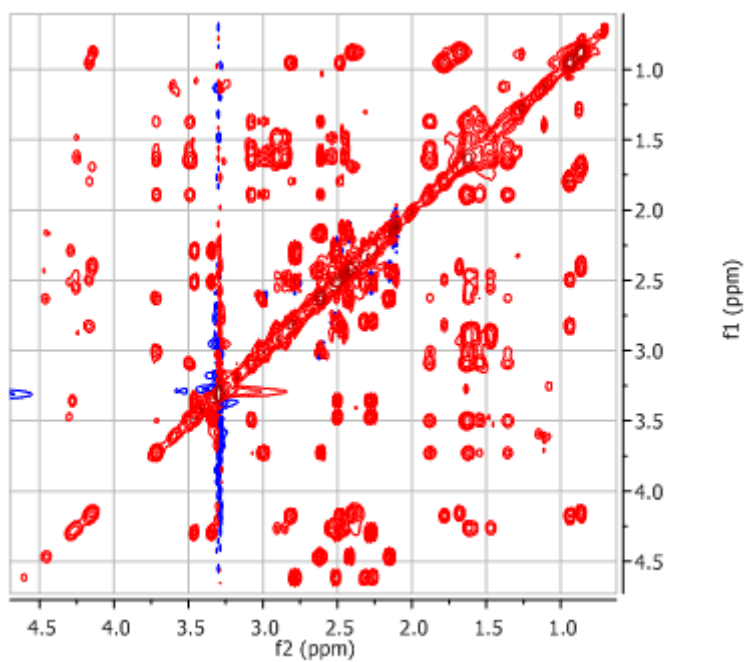

## 5. Structure calculations without H-bond restraints in vacuo

Statistics for 20 out of 200 calculated without hydrogen bond restraints:

a) calibrated: rmsd 0.42/0.86 backbone/heavy, no violations

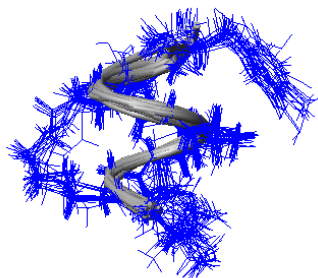

b) bin: rmsd 0.72/1.40 backbone/heavy, no violations

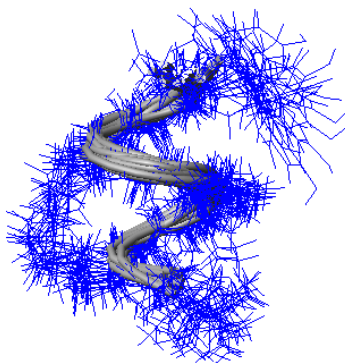

## 6. References.

- 
- <sup>1</sup> Neidig, K. P., Geyer, M., Görler, A., Antz, C., Saffrich, R., Beneicke, W., and Kalbitzer, H. R. (1995) AURELIA, a program for computer-aided analysis of multidimensional NMR spectra, *J. Biomol. NMR* **6**, 255-270
- <sup>2</sup> a) Wüthrich, K. *NMR of Proteins and Nucleic Acids*, Wiley, New York, 1986. b) Etezady-Esfarjani, T., Hilty, C., Wüthrich K., Rueping, M., Schreiber, J. Seebach, D. *Helv. Chim. Acta* **2002**, *85*, 1197–1209.
- <sup>3</sup> Vaz, E; Brunsveld, L. *Org. Lett.* **2006**, *8*, 4199-4202
- <sup>4</sup> Grieco, P.; Gitu, P. M.; Hruby, V. J. *J. Pept. Res.* **2001**, *57*, 250-256
- <sup>5</sup> Creighton, T. E. *Proteins: Structures and Molecular Principles*, 2nd ed.; W. H. Freeman and Company: New York, 1993; p14.
